# Supplementary material for: TBCRC 018: phase II study of iniparib in combination with irinotecan to treat progressive triple negative breast cancer brain metastases
Source: Springer Nature journal article supplement (doi:10.1007/s10549-014-3039-y), 2014-07-07
Supplement: MOESM4 [file 8846418]

## Sheet: Summary
	Table. Genes Significantly Associated with Tumor Response (FDR<25%)
			PROGRESSION	STABLE	PROGRESSION+STABLE
		GENES UPREGULATED IN RESPONDERS VERSUS	13	0	0
		GENES DOWNREGULATED IN RESPONDERS VERSUS	25*	28	30
			*, FDR<30%

## Sheet: SAM.ResponseVSProgression
TWO CLASS UNPAIRED SAM ANALYSIS
Group2: Partial Response
Group1: Tumor progression
Gene ID	Score(d)	Numerator(r)	Denominator(s+s0)	Fold Change	q-value(%)
NDC80	2.08818	1.57645	0.754939	2.98234	7.40741
CENPF	1.84111	1.40501	0.763131	2.64819	7.40741
NUF2	1.74115	1.50735	0.865723	2.84287	7.40741
TYMS	1.68405	1.37121	0.814233	2.58688	7.40741
NDRG1	1.67947	1.41771	0.844139	2.67161	7.40741
CEP55	1.64788	1.01879	0.618242	2.02621	7.40741
UBE2C	1.61906	1.18145	0.729711	2.26804	7.40741
CLDN7	1.58357	1.45783	0.920597	2.74695	7.40741
EXO1	1.50157	1.31436	0.875321	2.48691	7.40741
MELK	1.43075	1.10999	0.775811	2.15845	13.3333
BIRC5	1.27136	0.762767	0.59996	1.69674	23.8095
ANLN	1.24389	1.11611	0.897277	2.16762	23.8095
GRB7	1.15152	0.723127	0.627976	1.65076	23.8095
KRT14	1.14872	2.50853	2.18375	5.69039	31.3725
ESRP1	1.11716	0.604121	0.540765	1.52005	31.3725
CDC20	1.08209	0.874918	0.808544	1.8339	31.3725
CCNB1	1.05744	0.837697	0.792196	1.7872	31.3725
RAB25	0.942495	0.770498	0.817509	1.70586	48.4127
JUP	0.925358	0.55056	0.59497	1.46465	48.4127
CDC6	0.915866	0.631666	0.689693	1.54935	48.4127
BCL2	0.886741	0.939404	1.05939	1.91774	48.4127
PTTG1	0.855932	0.722897	0.844573	1.65049	48.4127
RRM2	0.838911	0.783854	0.93437	1.72172	48.4127
DSP	0.777789	0.597083	0.767668	1.51266	48.4127
UBE2T	0.767911	0.675744	0.879977	1.59742	48.4127
PNP	0.758483	0.5502	0.725395	1.46429	48.4127
KIF2C	0.694314	0.459654	0.662027	1.37521	48.4127
MYC	0.675568	0.422227	0.624996	1.33999	48.4127
SLC39A6	0.657922	0.431489	0.655837	1.34863	50.3546
F11R	0.650703	0.390615	0.600298	1.31095	50.3546
CD24	0.61386	0.481898	0.78503	1.39658	50.3546
MYBL2	0.609545	0.596397	0.978429	1.51194	50.3546
HSD17B8	0.609196	0.522554	0.857777	1.4365	50.3546
VEGFA	0.602295	0.561603	0.932439	1.47591	50.3546
DDIT4	0.5826	0.480384	0.824552	1.39512	50.3546
EPCAM	0.566134	0.478566	0.845324	1.39336	50.3546
CRYAB	0.501115	0.565331	1.12815	1.47973	52.2807
FABP5	0.418765	0.392338	0.936893	1.31252	52.2807
HDAC	0.410349	0.410299	0.999878	1.32896	52.2807
CCNE1	0.401038	0.270744	0.675107	1.20643	53.0864
SPINT1	0.389323	0.263995	0.678089	1.2008	53.0864
KRT17	0.386952	0.429933	1.11108	1.34717	53.0864
BAG1	0.380078	0.29957	0.788179	1.23078	53.0864
MPP1	0.372472	0.216004	0.57992	1.16151	53.0864
POU3F2	0.347567	0.662996	1.90753	1.58337	53.0864
KRT8	0.346006	0.280274	0.810027	1.21443	53.0864
SFRP1	0.343593	0.44315	1.28975	1.35957	53.0864
MKI67	0.330262	0.222102	0.672502	1.16643	53.0864
ERBB2	0.320987	0.250864	0.781537	1.18992	53.0864
GAL	0.3083	0.328974	1.06706	1.25612	53.0864
PTEN	0.276998	0.237257	0.856529	1.17875	53.8226
MDM2	0.228854	0.187157	0.817801	1.13852	54.6547
ORC6L	0.22406	0.186379	0.831827	1.1379	54.6547
PLOD1	0.15609	0.130622	0.836838	1.09477	57.1429
FGFR4	0.125602	0.158686	1.2634	1.11627	57.1429
RASSF1A	0.0605174	0.0438201	0.724091	1.03084	57.1429
MMP11	-2.0297	-2.63011	1.29581	0.161532	11.1111
GATA3	-1.91741	-2.06499	1.07697	0.238988	11.1111
CXXC5	-1.5042	-1.27589	0.848218	0.412971	11.1111
LEPRE1	-1.47113	-0.954578	0.648876	0.515993	11.1111
MAPT	-1.28971	-1.38296	1.0723	0.383432	29.8851
FOXA1	-1.24955	-1.48354	1.18726	0.357611	29.8851
FBN1	-1.24157	-1.20896	0.973734	0.43258	29.8851
CAV1	-1.23827	-1.31158	1.0592	0.402879	29.8851
BLVRA	-1.21994	-0.794683	0.651412	0.57647	29.8851
TMEM158	-1.14002	-1.24018	1.08786	0.423319	29.8851
PIF	-1.11303	-1.75433	1.57618	0.296411	29.8851
TWIST1	-1.09388	-1.2472	1.14016	0.421266	29.8851
STMN3	-1.06429	-0.9918	0.931892	0.50285	29.8851
TMEM45B	-1.03736	-1.39991	1.34948	0.378954	29.8851
SPINT2	-1.03142	-0.747723	0.724948	0.595543	29.8851
MET	-1.01838	-0.995312	0.977347	0.501627	29.8851
ZEB1	-1.00082	-0.752121	0.751507	0.59373	29.8851
AXL	-0.905335	-0.762256	0.841961	0.589574	29.8851
CLDN4	-0.875424	-0.637531	0.728255	0.642812	29.8851
NEUROG1	-0.84235	-1.33599	1.58603	0.396119	29.8851
TCF4	-0.826944	-0.758432	0.917149	0.591139	29.8851
FLVCR2	-0.804961	-0.65974	0.819592	0.632992	29.8851
RB1	-0.735873	-0.567949	0.771803	0.674575	29.8851
DYNLRB2	-0.71272	-1.24361	1.74488	0.422314	29.8851
FLRT2	-0.708715	-1.02699	1.44908	0.490734	29.8851
EGFR	-0.691708	-0.589557	0.85232	0.664547	42.4242
LHFP	-0.687393	-0.806952	1.17393	0.571588	42.4242
ESR2	-0.678954	-1.00905	1.48618	0.496873	42.4242
KRT5	-0.667926	-0.970514	1.45303	0.510324	42.4242
KRT19	-0.666813	-0.461007	0.691358	0.726479	42.4242
ADHFE1	-0.661397	-0.935332	1.41418	0.522922	42.4242
ERBB4	-0.648154	-0.941081	1.45194	0.520843	42.4242
MLPH	-0.625695	-0.639988	1.02284	0.641718	42.4242
UCHL1	-0.604915	-0.708072	1.17053	0.612138	42.4242
RAD50	-0.566385	-0.394096	0.695808	0.760966	42.4242
BRCA1	-0.548411	-0.669336	1.2205	0.628796	42.4242
GSTP1	-0.546431	-0.537971	0.984518	0.688739	42.4242
NAT1	-0.545248	-0.656331	1.20373	0.63449	42.4242
CDH3	-0.526698	-0.604455	1.14763	0.65772	42.4242
EVI2A	-0.484477	-0.458544	0.946472	0.72772	42.4242
ERBB3	-0.478289	-0.365081	0.763307	0.776425	42.4242
PVRL3	-0.462605	-0.450411	0.97364	0.731834	42.4242
ANGPTL4	-0.457502	-0.570429	1.24683	0.673416	42.4242
VAMP8	-0.451529	-0.244914	0.542409	0.843866	42.4242
SH2B3	-0.45124	-0.354598	0.785831	0.782087	42.4242
RAD17	-0.44316	-0.298508	0.67359	0.813093	42.4242
PGR	-0.415232	-0.575708	1.38647	0.670957	42.4242
GPR160	-0.410823	-0.458325	1.11563	0.727831	42.4242
RRAGD	-0.402903	-0.230452	0.571979	0.852368	42.4242
HSD17B4	-0.366441	-0.281708	0.768769	0.822616	44.4444
GNG11	-0.360534	-0.377978	1.04838	0.769515	44.4444
INPP4B	-0.34657	-0.462165	1.33354	0.725896	44.4444
ACTR3B	-0.331508	-0.202678	0.611381	0.868936	44.4444
FOXC1	-0.305276	-0.26807	0.878123	0.83043	44.4444
SLC16A3	-0.298574	-0.213696	0.715722	0.862325	44.4444
CLDN3	-0.254344	-0.229095	0.900731	0.85317	49.5726
NT5E	-0.244482	-0.305687	1.25035	0.809057	49.5726
EMP3	-0.235773	-0.20884	0.88577	0.865232	49.5726
WNK4	-0.233439	-0.425742	1.82379	0.744456	49.5726
MIA	-0.208039	-0.397672	1.91152	0.759082	49.5726
PHGDH	-0.193936	-0.351779	1.81389	0.783617	49.5726
ADM	-0.13252	-0.139778	1.05476	0.907659	49.5726
GRHL2	-0.121476	-0.0913913	0.75234	0.938617	49.5726
PIK3CA	-0.08459	-0.059494	0.703322	0.959601	49.5726
DDR1	-0.0587122	-0.0248652	0.42351	0.982912	49.5726
ESR1	-0.0462056	-0.0738359	1.59799	0.950108	49.5726
VIM	-0.0350466	-0.0308399	0.879968	0.97885	49.5726

## Sheet: GO.UP.ResponseVSProgression
DAVID ONLINE TOOL
Genes Upregulated in Responders compared to those that showed tumor progression
FDR<25%
Annotation Cluster 1	Enrichment Score: 3.850677041525462
Category	Term	Count	%	PValue	Genes	List Total	Pop Hits	Pop Total	Fold Enrichment	Bonferroni	Benjamini	FDR
SP_PIR_KEYWORDS	mitosis	7	53.8462	6.01963e-10	NUF2, CENPF, BIRC5, ANLN, NDC80, CEP55, UBE2C	13	183	19235	56.5973	3.55158e-08	3.55158e-08	6.01109e-07
GOTERM_BP_FAT	GO:0000279~M phase	8	61.5385	3.36921e-09	EXO1, NUF2, CENPF, BIRC5, ANLN, NDC80, CEP55, UBE2C	13	329	13528	25.3037	8.22088e-07	8.22088e-07	4.3602e-06
SP_PIR_KEYWORDS	cell division	7	53.8462	5.44635e-09	NUF2, CENPF, BIRC5, ANLN, NDC80, CEP55, UBE2C	13	264	19235	39.2322	3.21335e-07	1.60667e-07	5.43863e-06
GOTERM_BP_FAT	GO:0000280~nuclear division	7	53.8462	1.47183e-08	NUF2, CENPF, BIRC5, ANLN, NDC80, CEP55, UBE2C	13	220	13528	33.1105	3.59126e-06	1.79563e-06	1.90474e-05
GOTERM_BP_FAT	GO:0007067~mitosis	7	53.8462	1.47183e-08	NUF2, CENPF, BIRC5, ANLN, NDC80, CEP55, UBE2C	13	220	13528	33.1105	3.59126e-06	1.79563e-06	1.90474e-05
GOTERM_BP_FAT	GO:0000087~M phase of mitotic cell cycle	7	53.8462	1.63937e-08	NUF2, CENPF, BIRC5, ANLN, NDC80, CEP55, UBE2C	13	224	13528	32.5192	4.00007e-06	1.33336e-06	2.12156e-05
GOTERM_BP_FAT	GO:0022403~cell cycle phase	8	61.5385	1.65846e-08	EXO1, NUF2, CENPF, BIRC5, ANLN, NDC80, CEP55, UBE2C	13	414	13528	20.1085	4.04662e-06	1.01166e-06	2.14626e-05
GOTERM_BP_FAT	GO:0048285~organelle fission	7	53.8462	1.87073e-08	NUF2, CENPF, BIRC5, ANLN, NDC80, CEP55, UBE2C	13	229	13528	31.8092	4.56458e-06	9.12918e-07	2.42097e-05
GOTERM_BP_FAT	GO:0051301~cell division	7	53.8462	8.45909e-08	NUF2, CENPF, BIRC5, ANLN, NDC80, CEP55, UBE2C	13	295	13528	24.6926	2.064e-05	3.44003e-06	0.000109472
GOTERM_BP_FAT	GO:0022402~cell cycle process	8	61.5385	1.40969e-07	EXO1, NUF2, CENPF, BIRC5, ANLN, NDC80, CEP55, UBE2C	13	565	13528	14.7344	3.43957e-05	4.91375e-06	0.000182431
SP_PIR_KEYWORDS	cell cycle	7	53.8462	1.50015e-07	NUF2, CENPF, BIRC5, ANLN, NDC80, CEP55, UBE2C	13	461	19235	22.467	8.85085e-06	2.95029e-06	0.000149802
GOTERM_BP_FAT	GO:0000278~mitotic cell cycle	7	53.8462	3.23225e-07	NUF2, CENPF, BIRC5, ANLN, NDC80, CEP55, UBE2C	13	370	13528	19.6873	7.88639e-05	9.85833e-06	0.000418295
GOTERM_BP_FAT	GO:0007049~cell cycle	8	61.5385	1.22276e-06	EXO1, NUF2, CENPF, BIRC5, ANLN, NDC80, CEP55, UBE2C	13	776	13528	10.728	0.000298309	3.31499e-05	0.0015824
GOTERM_BP_FAT	GO:0007059~chromosome segregation	4	30.7692	4.37616e-05	NUF2, CENPF, BIRC5, NDC80	13	81	13528	51.3884	0.0106213	0.00106724	0.0566184
GOTERM_BP_FAT	GO:0007096~regulation of exit from mitosis	3	23.0769	4.73742e-05	BIRC5, ANLN, UBE2C	13	12	13528	260.154	0.011493	0.00105032	0.061291
GOTERM_CC_FAT	GO:0000775~chromosome, centromeric region	4	30.7692	7.17332e-05	NUF2, CENPF, BIRC5, NDC80	10	124	12782	41.2323	0.00429489	0.00429489	0.0718653
GOTERM_BP_FAT	GO:0010564~regulation of cell cycle process	4	30.7692	0.000121317	CENPF, BIRC5, ANLN, UBE2C	13	114	13528	36.5128	0.0291692	0.00246388	0.156886
GOTERM_BP_FAT	GO:0007346~regulation of mitotic cell cycle	4	30.7692	0.000284031	CENPF, BIRC5, ANLN, UBE2C	13	152	13528	27.3846	0.0669658	0.00531761	0.36695
SP_PIR_KEYWORDS	kinetochore	3	23.0769	0.000682231	NUF2, CENPF, NDC80	13	63	19235	70.4579	0.0394655	0.0100158	0.679179
GOTERM_CC_FAT	GO:0000777~condensed chromosome kinetochore	3	23.0769	0.000713767	NUF2, CENPF, NDC80	10	58	12782	66.1138	0.0419366	0.0211929	0.713014
UP_SEQ_FEATURE	mutagenesis site	7	53.8462	0.000777011	EXO1, BIRC5, ANLN, NDC80, CEP55, UBE2C, MELK	13	2045	19113	5.03257	0.0536939	0.0536939	0.803541
GOTERM_CC_FAT	GO:0000779~condensed chromosome, centromeric region	3	23.0769	0.000923508	NUF2, CENPF, NDC80	10	66	12782	58.1	0.0539275	0.018309	0.921663
GOTERM_CC_FAT	GO:0000776~kinetochore	3	23.0769	0.0012547	NUF2, CENPF, NDC80	10	77	12782	49.8	0.0725622	0.0186562	1.25033
GOTERM_BP_FAT	GO:0051656~establishment of organelle localization	3	23.0769	0.00163729	CENPF, BIRC5, NDC80	13	69	13528	45.2441	0.329563	0.028155	2.09827
GOTERM_CC_FAT	GO:0044427~chromosomal part	4	30.7692	0.00200422	NUF2, CENPF, BIRC5, NDC80	10	386	12782	13.2456	0.113411	0.0237872	1.9905
GOTERM_BP_FAT	GO:0051726~regulation of cell cycle	4	30.7692	0.0027099	CENPF, BIRC5, ANLN, UBE2C	13	331	13528	12.5754	0.48424	0.0405375	3.45078
GOTERM_BP_FAT	GO:0051640~organelle localization	3	23.0769	0.00288851	CENPF, BIRC5, NDC80	13	92	13528	33.9331	0.506295	0.0406685	3.67432
GOTERM_CC_FAT	GO:0005694~chromosome	4	30.7692	0.00330748	NUF2, CENPF, BIRC5, NDC80	10	460	12782	11.1148	0.180268	0.0325869	3.26563
GOTERM_CC_FAT	GO:0043232~intracellular non-membrane-bounded organelle	7	53.8462	0.00331912	NUF2, CENPF, BIRC5, ANLN, NDRG1, NDC80, CEP55	10	2596	12782	3.44661	0.180842	0.0280947	3.27695
GOTERM_CC_FAT	GO:0043228~non-membrane-bounded organelle	7	53.8462	0.00331912	NUF2, CENPF, BIRC5, ANLN, NDRG1, NDC80, CEP55	10	2596	12782	3.44661	0.180842	0.0280947	3.27695
GOTERM_CC_FAT	GO:0000793~condensed chromosome	3	23.0769	0.00347359	NUF2, CENPF, NDC80	10	129	12782	29.7256	0.188425	0.0257597	3.42707
SP_PIR_KEYWORDS	cytoskeleton	4	30.7692	0.00633135	CENPF, BIRC5, ANLN, CEP55	13	636	19235	9.30576	0.31253	0.0605458	6.14553
GOTERM_CC_FAT	GO:0005856~cytoskeleton	5	38.4615	0.0109373	CENPF, BIRC5, ANLN, NDRG1, CEP55	10	1381	12782	4.62781	0.483074	0.070694	10.4358
GOTERM_CC_FAT	GO:0044430~cytoskeletal part	4	30.7692	0.0246211	CENPF, BIRC5, ANLN, CEP55	10	952	12782	5.37059	0.775921	0.138927	22.1069
SP_PIR_KEYWORDS	coiled coil	5	38.4615	0.030048	NUF2, CENPF, ANLN, NDC80, CEP55	13	2019	19235	3.66423	0.834703	0.226744	26.2622
SP_PIR_KEYWORDS	nucleus	7	53.8462	0.0321453	EXO1, NUF2, CENPF, BIRC5, ANLN, NDRG1, NDC80	13	4283	19235	2.41824	0.854521	0.214131	27.839
SP_PIR_KEYWORDS	cytoplasm	6	46.1538	0.0421818	CENPF, BIRC5, ANLN, NDRG1, CEP55, MELK	13	3332	19235	2.66437	0.921349	0.246123	34.9726
SP_PIR_KEYWORDS	ubl conjugation	3	23.0769	0.0502713	BIRC5, ANLN, UBE2C	13	588	19235	7.54906	0.952316	0.262372	40.2534
GOTERM_CC_FAT	GO:0015630~microtubule cytoskeleton	3	23.0769	0.0542578	CENPF, BIRC5, CEP55	10	549	12782	6.9847	0.964814	0.262348	42.8254
SP_PIR_KEYWORDS	acetylation	4	30.7692	0.22031	EXO1, CENPF, ANLN, UBE2C	13	2635	19235	2.2461	1	0.705818	91.6679
GOTERM_CC_FAT	GO:0031981~nuclear lumen	3	23.0769	0.271985	CENPF, BIRC5, UBE2C	10	1450	12782	2.64455	1	0.768941	95.8465
GOTERM_CC_FAT	GO:0070013~intracellular organelle lumen	3	23.0769	0.362797	CENPF, BIRC5, UBE2C	10	1779	12782	2.15548	1	0.855059	98.9072
GOTERM_CC_FAT	GO:0043233~organelle lumen	3	23.0769	0.374041	CENPF, BIRC5, UBE2C	10	1820	12782	2.10692	1	0.846473	99.0858
GOTERM_CC_FAT	GO:0031974~membrane-enclosed lumen	3	23.0769	0.38388	CENPF, BIRC5, UBE2C	10	1856	12782	2.06606	1	0.837353	99.22
Annotation Cluster 2	Enrichment Score: 1.6137470747850475
Category	Term	Count	%	PValue	Genes	List Total	Pop Hits	Pop Total	Fold Enrichment	Bonferroni	Benjamini	FDR
GOTERM_BP_FAT	GO:0048015~phosphoinositide-mediated signaling	3	23.0769	0.00264669	TYMS, NDC80, UBE2C	13	88	13528	35.4755	0.476201	0.0421938	3.37155
GOTERM_BP_FAT	GO:0019932~second-messenger-mediated signaling	3	23.0769	0.0176827	TYMS, NDC80, UBE2C	13	235	13528	13.2845	0.987134	0.214821	20.6169
GOTERM_BP_FAT	GO:0007242~intracellular signaling cascade	3	23.0769	0.307969	TYMS, NDC80, UBE2C	13	1256	13528	2.48555	1	0.986119	99.1469

## Sheet: GO.DOWN.ResponseVSProgression
DAVID ONLINE TOOL
Genes Downregulated in Responders compared to those that showed tumor progression
FDR<30%
Annotation Cluster 1	Enrichment Score: 1.5959300173922646
Category	Term	Count	%	PValue	Genes	List Total	Pop Hits	Pop Total	Fold Enrichment	Bonferroni	Benjamini	FDR
GOTERM_BP_FAT	GO:0007017~microtubule-based process	4	16.6667	0.0058233	CAV1, STMN3, MAPT, DYNLRB2	21	253	13528	10.1848	0.94943	0.23762	8.09
GOTERM_BP_FAT	GO:0051493~regulation of cytoskeleton organization	3	12.5	0.0169331	CAV1, STMN3, MAPT	21	136	13528	14.2101	0.999838	0.420408	21.8612
GOTERM_BP_FAT	GO:0000226~microtubule cytoskeleton organization	3	12.5	0.0196032	CAV1, STMN3, MAPT	21	147	13528	13.1467	0.99996	0.448494	24.8715
GOTERM_BP_FAT	GO:0033043~regulation of organelle organization	3	12.5	0.0402602	CAV1, STMN3, MAPT	21	217	13528	8.90586	1	0.598674	44.7647
GOTERM_BP_FAT	GO:0007010~cytoskeleton organization	3	12.5	0.134661	CAV1, STMN3, MAPT	21	436	13528	4.4325	1	0.827905	87.6208
Annotation Cluster 2	Enrichment Score: 1.5121632261611766
Category	Term	Count	%	PValue	Genes	List Total	Pop Hits	Pop Total	Fold Enrichment	Bonferroni	Benjamini	FDR
GOTERM_BP_FAT	GO:0000122~negative regulation of transcription from RNA polymerase II promoter	5	20.8333	0.000552331	FOXA1, RB1, ZEB1, TCF4, TWIST1	21	266	13528	12.1088	0.245967	0.245967	0.794857
GOTERM_BP_FAT	GO:0051172~negative regulation of nitrogen compound metabolic process	6	25	0.000782896	CAV1, FOXA1, RB1, ZEB1, TCF4, TWIST1	21	519	13528	7.44729	0.329825	0.181358	1.12492
GOTERM_BP_FAT	GO:0031327~negative regulation of cellular biosynthetic process	6	25	0.00111205	CAV1, FOXA1, RB1, ZEB1, TCF4, TWIST1	21	561	13528	6.88974	0.433668	0.172648	1.59435
GOTERM_BP_FAT	GO:0009890~negative regulation of biosynthetic process	6	25	0.00122274	CAV1, FOXA1, RB1, ZEB1, TCF4, TWIST1	21	573	13528	6.74545	0.464846	0.144698	1.75173
GOTERM_BP_FAT	GO:0045892~negative regulation of transcription, DNA-dependent	5	20.8333	0.0016358	FOXA1, RB1, ZEB1, TCF4, TWIST1	21	356	13528	9.04762	0.566809	0.154067	2.33702
GOTERM_BP_FAT	GO:0051253~negative regulation of RNA metabolic process	5	20.8333	0.00173941	FOXA1, RB1, ZEB1, TCF4, TWIST1	21	362	13528	8.89766	0.589184	0.1378	2.48331
SP_PIR_KEYWORDS	activator	5	20.8333	0.0031071	GATA3, FOXA1, NEUROG1, ZEB1, TCF4	24	520	19235	7.70633	0.280979	0.152049	3.43164
GOTERM_BP_FAT	GO:0006357~regulation of transcription from RNA polymerase II promoter	6	25	0.00348825	FOXA1, NEUROG1, RB1, ZEB1, TCF4, TWIST1	21	727	13528	5.31657	0.832305	0.225151	4.92213
GOTERM_BP_FAT	GO:0010605~negative regulation of macromolecule metabolic process	6	25	0.00363572	CAV1, FOXA1, RB1, ZEB1, TCF4, TWIST1	21	734	13528	5.26586	0.84452	0.207573	5.12517
GOTERM_BP_FAT	GO:0016481~negative regulation of transcription	5	20.8333	0.00411286	FOXA1, RB1, ZEB1, TCF4, TWIST1	21	459	13528	7.01733	0.878277	0.208639	5.77933
INTERPRO	IPR011598:Helix-loop-helix DNA-binding	3	12.5	0.00543556	NEUROG1, TCF4, TWIST1	23	84	16659	25.868	0.377607	0.377607	5.72042
GOTERM_BP_FAT	GO:0010629~negative regulation of gene expression	5	20.8333	0.00573394	FOXA1, RB1, ZEB1, TCF4, TWIST1	21	504	13528	6.39078	0.947054	0.25461	7.9706
GOTERM_BP_FAT	GO:0045934~negative regulation of nucleobase, nucleoside, nucleotide and nucleic acid metabolic process	5	20.8333	0.00606138	FOXA1, RB1, ZEB1, TCF4, TWIST1	21	512	13528	6.29092	0.955256	0.228099	8.40741
GOTERM_BP_FAT	GO:0010558~negative regulation of macromolecule biosynthetic process	5	20.8333	0.00764249	FOXA1, RB1, ZEB1, TCF4, TWIST1	21	547	13528	5.8884	0.980165	0.260339	10.4896
UP_SEQ_FEATURE	domain:Helix-loop-helix motif	3	12.5	0.00822108	NEUROG1, TCF4, TWIST1	24	114	19113	20.9572	0.796731	0.796731	9.7751
INTERPRO	IPR001092:Basic helix-loop-helix dimerisation region bHLH	3	12.5	0.00980606	NEUROG1, TCF4, TWIST1	23	114	16659	19.0606	0.57571	0.348624	10.1028
SMART	SM00353:HLH	3	12.5	0.0111373	NEUROG1, TCF4, TWIST1	14	114	9079	17.0658	0.209584	0.209584	8.2844
GOTERM_MF_FAT	GO:0003700~transcription factor activity	6	25	0.0141716	GATA3, FOXA1, NEUROG1, RB1, ZEB1, TCF4	21	975	12983	3.80454	0.719252	0.719252	14.3531
GOTERM_BP_FAT	GO:0008285~negative regulation of cell proliferation	4	16.6667	0.0153372	CAV1, LEPRE1, RB1, ZEB1	21	361	13528	7.13784	0.999629	0.431153	20.0088
UP_SEQ_FEATURE	DNA-binding region:Basic motif	3	12.5	0.015887	NEUROG1, TCF4, TWIST1	24	161	19113	14.8393	0.954535	0.786775	18.0905
SP_PIR_KEYWORDS	dna-binding	7	29.1667	0.0197536	GATA3, FOXA1, NEUROG1, RB1, ZEB1, TCF4, TWIST1	24	1868	19235	3.00332	0.879348	0.505865	20.0584
GOTERM_MF_FAT	GO:0030528~transcription regulator activity	7	29.1667	0.0226564	GATA3, FOXA1, NEUROG1, RB1, ZEB1, TCF4, TWIST1	21	1512	12983	2.86221	0.869921	0.639335	22.0242
GOTERM_CC_FAT	GO:0005667~transcription factor complex	3	12.5	0.0277094	RB1, ZEB1, TCF4	17	210	12782	10.7412	0.910779	0.553157	26.1413
SP_PIR_KEYWORDS	transcription regulation	7	29.1667	0.0283651	GATA3, FOXA1, NEUROG1, RB1, ZEB1, TCF4, TWIST1	24	2026	19235	2.76911	0.952649	0.533521	27.5944
SP_PIR_KEYWORDS	Transcription	7	29.1667	0.0312237	GATA3, FOXA1, NEUROG1, RB1, ZEB1, TCF4, TWIST1	24	2071	19235	2.70894	0.965351	0.429027	29.9491
GOTERM_BP_FAT	GO:0045893~positive regulation of transcription, DNA-dependent	4	16.6667	0.0317927	FOXA1, RB1, ZEB1, TCF4	21	477	13528	5.40202	1	0.600371	37.2924
GOTERM_BP_FAT	GO:0051254~positive regulation of RNA metabolic process	4	16.6667	0.0324788	FOXA1, RB1, ZEB1, TCF4	21	481	13528	5.35709	1	0.588526	37.9312
GOTERM_BP_FAT	GO:0010604~positive regulation of macromolecule metabolic process	5	20.8333	0.0343517	CAV1, FOXA1, RB1, ZEB1, TCF4	21	857	13528	3.7584	1	0.590622	39.6443
GOTERM_BP_FAT	GO:0006355~regulation of transcription, DNA-dependent	7	29.1667	0.0381771	GATA3, FOXA1, NEUROG1, RB1, ZEB1, TCF4, TWIST1	21	1773	13528	2.54334	1	0.612164	43.0075
GOTERM_BP_FAT	GO:0045596~negative regulation of cell differentiation	3	12.5	0.0399241	CAV1, ZEB1, TWIST1	21	216	13528	8.94709	1	0.611844	44.4847
GOTERM_BP_FAT	GO:0051252~regulation of RNA metabolic process	7	29.1667	0.0420147	GATA3, FOXA1, NEUROG1, RB1, ZEB1, TCF4, TWIST1	21	1813	13528	2.48722	1	0.599042	46.2054
GOTERM_MF_FAT	GO:0008134~transcription factor binding	4	16.6667	0.0424129	GATA3, RB1, ZEB1, TCF4	21	513	12983	4.82057	0.978872	0.723546	37.5281
GOTERM_BP_FAT	GO:0045941~positive regulation of transcription	4	16.6667	0.0484833	FOXA1, RB1, ZEB1, TCF4	21	564	13528	4.56873	1	0.62347	51.2206
GOTERM_BP_FAT	GO:0010628~positive regulation of gene expression	4	16.6667	0.0521714	FOXA1, RB1, ZEB1, TCF4	21	581	13528	4.43505	1	0.637265	53.8816
GOTERM_MF_FAT	GO:0003677~DNA binding	8	33.3333	0.0528975	GATA3, FOXA1, NEUROG1, RB1, ZEB1, CXXC5, TCF4, TWIST1	21	2331	12983	2.1218	0.992069	0.701577	44.5653
SP_PIR_KEYWORDS	DNA binding	3	12.5	0.0617646	RB1, ZEB1, TWIST1	24	340	19235	7.07169	0.998838	0.570334	51.0998
GOTERM_BP_FAT	GO:0045935~positive regulation of nucleobase, nucleoside, nucleotide and nucleic acid metabolic process	4	16.6667	0.0621047	FOXA1, RB1, ZEB1, TCF4	21	624	13528	4.12943	1	0.689675	60.3918
GOTERM_BP_FAT	GO:0051173~positive regulation of nitrogen compound metabolic process	4	16.6667	0.0670138	FOXA1, RB1, ZEB1, TCF4	21	644	13528	4.00118	1	0.693186	63.2833
GOTERM_BP_FAT	GO:0010557~positive regulation of macromolecule biosynthetic process	4	16.6667	0.0695357	FOXA1, RB1, ZEB1, TCF4	21	654	13528	3.94	1	0.695175	64.6911
GOTERM_BP_FAT	GO:0048598~embryonic morphogenesis	3	12.5	0.0745902	NEUROG1, ZEB1, TWIST1	21	307	13528	6.29502	1	0.71	67.3627
GOTERM_BP_FAT	GO:0006350~transcription	7	29.1667	0.0772234	GATA3, FOXA1, NEUROG1, RB1, ZEB1, TCF4, TWIST1	21	2101	13528	2.14628	1	0.711912	68.6788
GOTERM_BP_FAT	GO:0031328~positive regulation of cellular biosynthetic process	4	16.6667	0.077633	FOXA1, RB1, ZEB1, TCF4	21	685	13528	3.7617	1	0.703159	68.879
GOTERM_BP_FAT	GO:0009891~positive regulation of biosynthetic process	4	16.6667	0.0803336	FOXA1, RB1, ZEB1, TCF4	21	695	13528	3.70757	1	0.695384	70.1696
GOTERM_MF_FAT	GO:0016564~transcription repressor activity	3	12.5	0.0841692	RB1, ZEB1, TCF4	21	316	12983	5.86935	0.9996	0.728611	61.4972
SP_PIR_KEYWORDS	repressor	3	12.5	0.0945497	FOXA1, RB1, ZEB1	24	435	19235	5.5273	0.999973	0.651049	67.1922
GOTERM_BP_FAT	GO:0045944~positive regulation of transcription from RNA polymerase II promoter	3	12.5	0.103098	FOXA1, RB1, ZEB1	21	371	13528	5.20909	1	0.759653	79.2305
GOTERM_MF_FAT	GO:0003712~transcription cofactor activity	3	12.5	0.106491	RB1, ZEB1, TCF4	21	363	12983	5.10941	0.999956	0.761076	70.5446
GOTERM_BP_FAT	GO:0042127~regulation of cell proliferation	4	16.6667	0.107099	CAV1, LEPRE1, RB1, ZEB1	21	787	13528	3.27416	1	0.756309	80.5295
GOTERM_CC_FAT	GO:0044451~nucleoplasm part	3	12.5	0.151438	RB1, ZEB1, TCF4	17	555	12782	4.06423	0.999999	0.791777	82.9796
GOTERM_BP_FAT	GO:0045449~regulation of transcription	7	29.1667	0.171088	GATA3, FOXA1, NEUROG1, RB1, ZEB1, TCF4, TWIST1	21	2601	13528	1.73369	1	0.869984	93.3488
SP_PIR_KEYWORDS	nucleus	8	33.3333	0.237202	GATA3, FOXA1, NEUROG1, RB1, ZEB1, CXXC5, TCF4, TWIST1	24	4283	19235	1.497	1	0.85242	95.208
SP_PIR_KEYWORDS	developmental protein	3	12.5	0.238448	FOXA1, NEUROG1, TWIST1	24	779	19235	3.08649	1	0.835465	95.2951
GOTERM_MF_FAT	GO:0043565~sequence-specific DNA binding	3	12.5	0.239687	GATA3, FOXA1, ZEB1	21	607	12983	3.05554	1	0.93345	94.8933
GOTERM_CC_FAT	GO:0005654~nucleoplasm	3	12.5	0.303707	RB1, ZEB1, TCF4	17	882	12782	2.55742	1	0.925296	97.9827
GOTERM_BP_FAT	GO:0042592~homeostatic process	3	12.5	0.305831	CAV1, FOXA1, RB1	21	751	13528	2.57333	1	0.977782	99.4871
GOTERM_CC_FAT	GO:0031981~nuclear lumen	3	12.5	0.556286	RB1, ZEB1, TCF4	17	1450	12782	1.55562	1	0.979397	99.9843
GOTERM_CC_FAT	GO:0070013~intracellular organelle lumen	3	12.5	0.674098	RB1, ZEB1, TCF4	17	1779	12782	1.26793	1	0.993747	99.9994
GOTERM_CC_FAT	GO:0043233~organelle lumen	3	12.5	0.687054	RB1, ZEB1, TCF4	17	1820	12782	1.23937	1	0.993231	99.9996
GOTERM_CC_FAT	GO:0031974~membrane-enclosed lumen	3	12.5	0.698115	RB1, ZEB1, TCF4	17	1856	12782	1.21533	1	0.99259	99.9998
Annotation Cluster 3	Enrichment Score: 1.1795663186771965
Category	Term	Count	%	PValue	Genes	List Total	Pop Hits	Pop Total	Fold Enrichment	Bonferroni	Benjamini	FDR
GOTERM_CC_FAT	GO:0031012~extracellular matrix	5	20.8333	0.000733919	FLRT2, LEPRE1, SPINT2, FBN1, MMP11	17	345	12782	10.8968	0.0611882	0.0611882	0.788572
GOTERM_CC_FAT	GO:0005578~proteinaceous extracellular matrix	4	16.6667	0.0068331	FLRT2, LEPRE1, FBN1, MMP11	17	320	12782	9.39853	0.445486	0.255343	7.12691
GOTERM_CC_FAT	GO:0044421~extracellular region part	5	20.8333	0.0277678	FLRT2, LEPRE1, SPINT2, FBN1, MMP11	17	960	12782	3.91605	0.911239	0.454173	26.1891
SP_PIR_KEYWORDS	extracellular matrix	3	12.5	0.033273	LEPRE1, FBN1, MMP11	24	241	19235	9.97666	0.972317	0.400957	31.594
SP_PIR_KEYWORDS	signal	8	33.3333	0.0794512	FLRT2, LEPRE1, SPINT2, MET, FBN1, TMEM158, AXL, MMP11	24	3250	19235	1.97282	0.999845	0.622817	60.5026
UP_SEQ_FEATURE	signal peptide	8	33.3333	0.0816977	FLRT2, LEPRE1, SPINT2, MET, FBN1, TMEM158, AXL, MMP11	24	3250	19113	1.96031	1	0.995843	65.4243
GOTERM_CC_FAT	GO:0005576~extracellular region	5	20.8333	0.235879	FLRT2, LEPRE1, SPINT2, FBN1, MMP11	17	2010	12782	1.87035	1	0.877949	94.5033
SP_PIR_KEYWORDS	glycoprotein	8	33.3333	0.244007	FLRT2, LEPRE1, SPINT2, MAPT, MET, FBN1, TMEM158, AXL	24	4318	19235	1.48487	1	0.825207	95.6664
SP_PIR_KEYWORDS	disulfide bond	6	25	0.265131	SPINT2, MAPT, MET, FBN1, AXL, MMP11	24	2924	19235	1.64458	1	0.820696	96.8469
UP_SEQ_FEATURE	glycosylation site:N-linked (GlcNAc...)	7	29.1667	0.376936	FLRT2, LEPRE1, SPINT2, MET, FBN1, TMEM158, AXL	24	4129	19113	1.35012	1	0.999998	99.7248
SP_PIR_KEYWORDS	Secreted	3	12.5	0.611985	LEPRE1, FBN1, MMP11	24	1689	19235	1.42355	1	0.984721	99.9976
Annotation Cluster 4	Enrichment Score: 0.8579979097653476
Category	Term	Count	%	PValue	Genes	List Total	Pop Hits	Pop Total	Fold Enrichment	Bonferroni	Benjamini	FDR
GOTERM_BP_FAT	GO:0045859~regulation of protein kinase activity	3	12.5	0.0911693	CAV1, MET, RB1	21	345	13528	5.60166	1	0.732935	74.8633
GOTERM_BP_FAT	GO:0043549~regulation of kinase activity	3	12.5	0.0966196	CAV1, MET, RB1	21	357	13528	5.41337	1	0.744979	76.9551
GOTERM_BP_FAT	GO:0051338~regulation of transferase activity	3	12.5	0.103565	CAV1, MET, RB1	21	372	13528	5.19508	1	0.752585	79.3863
GOTERM_BP_FAT	GO:0042325~regulation of phosphorylation	3	12.5	0.149927	CAV1, MET, RB1	21	466	13528	4.14715	1	0.848388	90.4273
GOTERM_BP_FAT	GO:0019220~regulation of phosphate metabolic process	3	12.5	0.159783	CAV1, MET, RB1	21	485	13528	3.98468	1	0.855427	91.9114
GOTERM_BP_FAT	GO:0051174~regulation of phosphorus metabolic process	3	12.5	0.159783	CAV1, MET, RB1	21	485	13528	3.98468	1	0.855427	91.9114
GOTERM_BP_FAT	GO:0007242~intracellular signaling cascade	4	16.6667	0.282453	CAV1, STMN3, MET, RB1	21	1256	13528	2.05156	1	0.970798	99.1724
Annotation Cluster 5	Enrichment Score: 0.7339572091172705
Category	Term	Count	%	PValue	Genes	List Total	Pop Hits	Pop Total	Fold Enrichment	Bonferroni	Benjamini	FDR
GOTERM_MF_FAT	GO:0005198~structural molecule activity	4	16.6667	0.0712222	CAV1, CLDN4, MAPT, FBN1	21	634	12983	3.90056	0.998606	0.73157	55.1592
GOTERM_CC_FAT	GO:0044459~plasma membrane part	6	25	0.126545	FLRT2, CAV1, CLDN4, MAPT, MET, AXL	17	2203	12782	2.0478	0.999991	0.810286	76.7523
GOTERM_MF_FAT	GO:0042802~identical protein binding	3	12.5	0.258825	CAV1, CLDN4, MAPT	21	640	12983	2.89799	1	0.930451	96.1279
SP_PIR_KEYWORDS	cell membrane	4	16.6667	0.496941	CAV1, CLDN4, MAPT, FLVCR2	24	2194	19235	1.46118	1	0.957845	99.9551
Annotation Cluster 6	Enrichment Score: 0.7037169506479612
Category	Term	Count	%	PValue	Genes	List Total	Pop Hits	Pop Total	Fold Enrichment	Bonferroni	Benjamini	FDR
GOTERM_CC_FAT	GO:0005887~integral to plasma membrane	5	20.8333	0.0546394	FLRT2, CAV1, CLDN4, MET, AXL	17	1188	12782	3.16449	0.992031	0.619568	45.4418
GOTERM_CC_FAT	GO:0031226~intrinsic to plasma membrane	5	20.8333	0.0585439	FLRT2, CAV1, CLDN4, MET, AXL	17	1215	12782	3.09417	0.994418	0.57882	47.8231
GOTERM_CC_FAT	GO:0044459~plasma membrane part	6	25	0.126545	FLRT2, CAV1, CLDN4, MAPT, MET, AXL	17	2203	12782	2.0478	0.999991	0.810286	76.7523
GOTERM_CC_FAT	GO:0005886~plasma membrane	8	33.3333	0.16473	FLRT2, CAV1, CLDN4, SPINT2, MAPT, MET, AXL, FLVCR2	17	3777	12782	1.59255	1	0.787327	85.6439
SP_PIR_KEYWORDS	transmembrane protein	3	12.5	0.178115	CAV1, MET, AXL	24	642	19235	3.74513	1	0.797985	88.9313
UP_SEQ_FEATURE	transmembrane region	9	37.5	0.219009	FLRT2, CAV1, TMEM45B, CLDN4, SPINT2, MET, TMEM158, AXL, FLVCR2	24	4911	19113	1.45945	1	0.999648	95.405
SP_PIR_KEYWORDS	transmembrane	9	37.5	0.224414	FLRT2, CAV1, TMEM45B, CLDN4, SPINT2, MET, TMEM158, AXL, FLVCR2	24	4973	19235	1.45046	1	0.854003	94.2252
SP_PIR_KEYWORDS	membrane	10	41.6667	0.317898	FLRT2, CAV1, TMEM45B, CLDN4, SPINT2, MAPT, MET, TMEM158, AXL, FLVCR2	24	6256	19235	1.2811	1	0.855011	98.6335
GOTERM_CC_FAT	GO:0016021~integral to membrane	9	37.5	0.32583	FLRT2, CAV1, TMEM45B, CLDN4, SPINT2, MET, TMEM158, AXL, FLVCR2	17	5297	12782	1.2775	1	0.926338	98.5758
GOTERM_CC_FAT	GO:0031224~intrinsic to membrane	9	37.5	0.370763	FLRT2, CAV1, TMEM45B, CLDN4, SPINT2, MET, TMEM158, AXL, FLVCR2	17	5485	12782	1.23372	1	0.929768	99.3231
UP_SEQ_FEATURE	topological domain:Cytoplasmic	6	25	0.383495	FLRT2, CAV1, CLDN4, SPINT2, MET, AXL	24	3374	19113	1.4162	1	0.999991	99.7588
UP_SEQ_FEATURE	topological domain:Extracellular	5	20.8333	0.417876	FLRT2, CLDN4, SPINT2, MET, AXL	24	2719	19113	1.46446	1	0.999991	99.882
Annotation Cluster 7	Enrichment Score: 0.3520342092410476
Category	Term	Count	%	PValue	Genes	List Total	Pop Hits	Pop Total	Fold Enrichment	Bonferroni	Benjamini	FDR
GOTERM_CC_FAT	GO:0015630~microtubule cytoskeleton	3	12.5	0.148815	MAPT, RB1, DYNLRB2	17	549	12782	4.10865	0.999999	0.823088	82.4035
GOTERM_CC_FAT	GO:0044430~cytoskeletal part	3	12.5	0.336972	MAPT, RB1, DYNLRB2	17	952	12782	2.36938	1	0.919888	98.8101
SP_PIR_KEYWORDS	acetylation	5	20.8333	0.388694	BLVRA, CAV1, MAPT, RB1, DYNLRB2	24	2635	19235	1.52079	1	0.906641	99.6004
GOTERM_CC_FAT	GO:0005856~cytoskeleton	3	12.5	0.528532	MAPT, RB1, DYNLRB2	17	1381	12782	1.63334	1	0.977713	99.9699
GOTERM_CC_FAT	GO:0043228~non-membrane-bounded organelle	3	12.5	0.86584	MAPT, RB1, DYNLRB2	17	2596	12782	0.868893	1	0.999611	100
GOTERM_CC_FAT	GO:0043232~intracellular non-membrane-bounded organelle	3	12.5	0.86584	MAPT, RB1, DYNLRB2	17	2596	12782	0.868893	1	0.999611	100
Annotation Cluster 8	Enrichment Score: 0.31866752361938816
Category	Term	Count	%	PValue	Genes	List Total	Pop Hits	Pop Total	Fold Enrichment	Bonferroni	Benjamini	FDR
SP_PIR_KEYWORDS	zinc	5	20.8333	0.262235	BLVRA, GATA3, ZEB1, CXXC5, MMP11	24	2189	19235	1.83065	1	0.833204	96.7046
SP_PIR_KEYWORDS	metal-binding	6	25	0.276733	BLVRA, LEPRE1, GATA3, ZEB1, CXXC5, MMP11	24	2972	19235	1.61802	1	0.820409	97.3625
GOTERM_MF_FAT	GO:0046914~transition metal ion binding	6	25	0.434	BLVRA, LEPRE1, GATA3, ZEB1, CXXC5, MMP11	21	2785	12983	1.33193	1	0.989999	99.7926
GOTERM_MF_FAT	GO:0008270~zinc ion binding	5	20.8333	0.488012	BLVRA, GATA3, ZEB1, CXXC5, MMP11	21	2311	12983	1.3376	1	0.993023	99.9302
SP_PIR_KEYWORDS	zinc-finger	3	12.5	0.621625	GATA3, ZEB1, CXXC5	24	1718	19235	1.39952	1	0.983767	99.9982
GOTERM_MF_FAT	GO:0046872~metal ion binding	7	29.1667	0.653563	BLVRA, LEPRE1, GATA3, FBN1, ZEB1, CXXC5, MMP11	21	4140	12983	1.04533	1	0.999295	99.999
GOTERM_MF_FAT	GO:0043169~cation binding	7	29.1667	0.664144	BLVRA, LEPRE1, GATA3, FBN1, ZEB1, CXXC5, MMP11	21	4179	12983	1.03557	1	0.999028	99.9993
GOTERM_MF_FAT	GO:0043167~ion binding	7	29.1667	0.680629	BLVRA, LEPRE1, GATA3, FBN1, ZEB1, CXXC5, MMP11	21	4241	12983	1.02044	1	0.998855	99.9996

## Sheet: SAM.ResponseVSStable
TWO CLASS UNPAIRED SAM ANALYSIS
Group2: Partial Response
Group1: Stable disease
Gene ID	Score(d)	Numerator(r)	Denominator(s+s0)	Fold Change	q-value(%)
CEP55	1.12769	1.01074	0.896291	2.01494	100
MELK	1.06267	1.17128	1.10221	2.25211	100
CENPF	0.958801	1.27309	1.3278	2.41679	100
BCL2	0.82016	1.01668	1.23961	2.02325	100
UBE2C	0.810384	0.760257	0.938144	1.69379	100
DSP	0.782363	0.599726	0.766557	1.51543	100
KRT8	0.765881	0.651017	0.850023	1.57027	100
KRT17	0.727609	1.22921	1.68939	2.34439	100
NDC80	0.700596	0.881373	1.25803	1.84213	100
EXO1	0.691875	0.760846	1.09969	1.69448	100
CLDN7	0.669784	0.672882	1.00463	1.59425	100
CCNB1	0.59404	0.534678	0.900071	1.44862	100
CD24	0.578864	0.542721	0.937564	1.45672	100
UBE2T	0.564661	0.653365	1.15709	1.57283	100
NUF2	0.526015	0.759787	1.44442	1.69324	100
TYMS	0.523967	0.54083	1.03218	1.45481	100
MIA	0.496877	0.974737	1.96173	1.96528	100
ANLN	0.470889	0.573871	1.2187	1.48851	100
KRT14	0.453299	1.15924	2.55735	2.2334	100
PTTG1	0.451377	0.49931	1.10619	1.41354	100
FABP5	0.435854	0.484218	1.11096	1.39883	100
RAB25	0.42747	0.477579	1.11722	1.3924	100
MYC	0.419281	0.370889	0.884582	1.29315	100
KIF2C	0.404802	0.382976	0.946083	1.30403	100
GAL	0.399155	0.61669	1.54499	1.53335	100
JUP	0.393432	0.305694	0.776994	1.23601	100
NDRG1	0.382629	0.367892	0.961485	1.29047	100
CLDN4	0.379444	0.418138	1.10198	1.3362	100
ACTR3B	0.359437	0.275017	0.765134	1.21001	100
CRYAB	0.35801	0.396537	1.10761	1.31634	100
RRM2	0.269165	0.278561	1.03491	1.21298	100
ESRP1	0.250624	0.210482	0.839829	1.15707	100
PHGDH	0.217134	0.211793	0.975403	1.15813	100
CDC20	0.196996	0.228537	1.16011	1.17165	100
CLDN3	0.177676	0.229478	1.29155	1.17241	100
PIK3CA	0.130591	0.10043	0.769038	1.07209	100
MKI67	0.108472	0.129251	1.19157	1.09373	100
VIM	0.0996343	0.105532	1.0592	1.07589	100
EPCAM	0.0890454	0.0888849	0.998197	1.06355	100
CDC6	0.0870127	0.095422	1.09664	1.06838	100
HDAC	0.062669	0.0821765	1.31128	1.05861	100
F11R	0.0593231	0.043995	0.741617	1.03096	100
SFRP1	0.0416309	0.0782989	1.88079	1.05577	100
KRT5	0.0378466	0.0615678	1.62677	1.0436	100
FOXC1	0.0152449	0.0218941	1.43616	1.01529	100
FOXA1	-1.48104	-3.02821	2.04465	0.122579	24.7967
ANGPTL4	-1.47911	-1.77439	1.19964	0.292317	24.7967
TMEM45B	-1.46537	-2.73394	1.8657	0.150315	24.7967
MMP11	-1.42155	-2.20856	1.55363	0.216349	24.7967
DYNLRB2	-1.40418	-2.48408	1.76906	0.178738	24.7967
CXXC5	-1.37496	-1.1341	0.824827	0.455618	24.7967
LEPRE1	-1.34582	-1.42561	1.05929	0.372262	24.7967
RB1	-1.34009	-1.16842	0.871893	0.444909	24.7967
LHFP	-1.28869	-1.19219	0.925121	0.437637	24.7967
ZEB1	-1.20413	-1.32958	1.10419	0.397884	24.7967
PIF	-1.19287	-2.3303	1.95352	0.198842	24.7967
CAV1	-1.15884	-1.67333	1.44397	0.313529	24.7967
INPP4B	-1.10612	-1.73862	1.57181	0.299656	24.7967
BLVRA	-1.07435	-0.896976	0.834901	0.537011	24.7967
FBN1	-1.06157	-1.29683	1.22162	0.407019	24.7967
STMN3	-1.03713	-1.28081	1.23496	0.411564	24.7967
TCF4	-1.01773	-0.997844	0.980463	0.500748	24.7967
NAT1	-1.01105	-1.43881	1.42308	0.368871	24.7967
FLRT2	-0.993313	-1.49694	1.50702	0.354304	24.7967
PVRL3	-0.988925	-1.15439	1.16732	0.449256	24.7967
FGFR4	-0.984526	-1.58524	1.61015	0.33327	24.7967
ESR2	-0.983192	-1.63861	1.66662	0.321165	24.7967
TWIST1	-0.957264	-1.40705	1.46987	0.377082	24.7967
MAPT	-0.953179	-1.74975	1.8357	0.297352	24.7967
ERBB4	-0.943623	-1.68672	1.78749	0.310632	24.7967
WNK4	-0.937746	-1.7224	1.83675	0.303043	24.7967
ADHFE1	-0.935495	-1.70633	1.82399	0.306438	24.7967
NEUROG1	-0.932905	-2.00253	2.14655	0.249562	24.7967
PGR	-0.870917	-1.46463	1.68171	0.362328	29.7561
MLPH	-0.865891	-1.3641	1.57537	0.388477	29.7561
GNG11	-0.835263	-0.986307	1.18083	0.504768	34.0955
TMEM158	-0.815814	-1.28481	1.57488	0.410426	34.0955
SLC16A3	-0.776542	-0.698411	0.899385	0.616251	36.068
GATA3	-0.726546	-1.07244	1.47608	0.475514	43.759
GPR160	-0.696135	-1.0251	1.47255	0.491378	43.759
AXL	-0.681276	-0.564985	0.829305	0.675962	52.2037
RAD17	-0.652557	-0.622489	0.953922	0.64955	52.2037
GRHL2	-0.649877	-0.601014	0.924811	0.659291	52.2037
NT5E	-0.585676	-0.67867	1.15878	0.624741	61.0381
DDR1	-0.530403	-0.437676	0.825176	0.738323	61.0381
HSD17B4	-0.510284	-0.448228	0.878389	0.732943	61.0381
UCHL1	-0.506524	-0.681302	1.34505	0.623602	61.0381
EVI2A	-0.478785	-0.770489	1.60926	0.586219	61.0381
VAMP8	-0.470129	-0.410003	0.872106	0.752622	81.153
ERBB3	-0.464532	-0.543139	1.16922	0.686276	81.153
FLVCR2	-0.442144	-0.742845	1.6801	0.59756	81.153
RRAGD	-0.440243	-0.502722	1.14192	0.705774	81.153
PNP	-0.431675	-0.315597	0.731098	0.803518	81.153
BRCA1	-0.401002	-0.575697	1.43565	0.670962	81.153
CDH3	-0.396688	-0.468277	1.18047	0.722827	81.153
EGFR	-0.383655	-0.402604	1.04939	0.756492	81.153
RAD50	-0.368623	-0.43211	1.17223	0.741177	81.153
PLOD1	-0.36549	-0.320376	0.876567	0.800861	81.153
MET	-0.360432	-0.475089	1.31811	0.719423	81.153
HSD17B8	-0.356293	-0.400996	1.12547	0.757335	81.153
GSTP1	-0.299377	-0.274122	0.91564	0.826954	91.748
SH2B3	-0.293718	-0.258938	0.881585	0.835703	91.748
BIRC5	-0.272664	-0.244846	0.897977	0.843906	91.748
ERBB2	-0.258714	-0.241135	0.932052	0.84608	91.748
KRT19	-0.255189	-0.274303	1.0749	0.82685	91.748
EMP3	-0.216021	-0.231429	1.07133	0.85179	91.748
ESR1	-0.202029	-0.364676	1.80506	0.776643	91.748
MPP1	-0.197652	-0.255043	1.29036	0.837962	91.748
ADM	-0.186653	-0.20318	1.08855	0.868634	91.748
DDIT4	-0.179726	-0.17383	0.967194	0.886486	91.748
PTEN	-0.153603	-0.158899	1.03448	0.895709	91.748
RASSF1A	-0.148582	-0.128694	0.866143	0.914659	91.748
ORC6L	-0.135282	-0.190295	1.40665	0.876427	91.748
CCNE1	-0.133925	-0.172899	1.29101	0.887058	91.748
MYBL2	-0.124926	-0.123925	0.991989	0.917688	91.748
VEGFA	-0.082502	-0.0807649	0.978945	0.945556	91.748
SPINT1	-0.0824512	-0.0757583	0.918826	0.948843	91.748
SLC39A6	-0.0776237	-0.0650716	0.838296	0.955898	91.748
GRB7	-0.066347	-0.0705598	1.0635	0.952268	91.748
POU3F2	-0.0551065	-0.109185	1.98134	0.927112	91.748
SPINT2	-0.0424917	-0.0371596	0.874514	0.974572	91.748
MDM2	-0.0313573	-0.0240707	0.767629	0.983454	91.748
BAG1	-0.014353	-0.0196603	1.36977	0.986465	91.748

## Sheet: GO.DOWN.ResponseVSStable
DAVID ONLINE TOOL
Genes Downregulated in Responders compared to those that showed stable disease
FDR<25%
Annotation Cluster 1	Enrichment Score: 1.5817489405923262
Category	Term	Count	%	PValue	Genes	List Total	Pop Hits	Pop Total	Fold Enrichment	Bonferroni	Benjamini	FDR
GOTERM_BP_FAT	GO:0006357~regulation of transcription from RNA polymerase II promoter	7	25.9259	0.000638547	FOXA1, NEUROG1, RB1, ZEB1, ESR2, TCF4, TWIST1	22	727	13528	5.92072	0.310035	0.310035	0.934835
GOTERM_BP_FAT	GO:0000122~negative regulation of transcription from RNA polymerase II promoter	5	18.5185	0.00067182	FOXA1, RB1, ZEB1, TCF4, TWIST1	22	266	13528	11.5584	0.323254	0.177354	0.983323
GOTERM_BP_FAT	GO:0051172~negative regulation of nitrogen compound metabolic process	6	22.2222	0.000995452	CAV1, FOXA1, RB1, ZEB1, TCF4, TWIST1	22	519	13528	7.10878	0.439343	0.134685	1.45379
GOTERM_BP_FAT	GO:0031327~negative regulation of cellular biosynthetic process	6	22.2222	0.00141031	CAV1, FOXA1, RB1, ZEB1, TCF4, TWIST1	22	561	13528	6.57657	0.559556	0.127735	2.05383
GOTERM_BP_FAT	GO:0009890~negative regulation of biosynthetic process	6	22.2222	0.00154954	CAV1, FOXA1, RB1, ZEB1, TCF4, TWIST1	22	573	13528	6.43884	0.593828	0.120772	2.25443
GOTERM_BP_FAT	GO:0045892~negative regulation of transcription, DNA-dependent	5	18.5185	0.00197919	FOXA1, RB1, ZEB1, TCF4, TWIST1	22	356	13528	8.63636	0.683695	0.134009	2.8711
GOTERM_BP_FAT	GO:0008285~negative regulation of cell proliferation	5	18.5185	0.00208267	CAV1, LEPRE1, RB1, ZEB1, ESR2	22	361	13528	8.51675	0.702188	0.125924	3.01908
GOTERM_BP_FAT	GO:0051253~negative regulation of RNA metabolic process	5	18.5185	0.00210381	FOXA1, RB1, ZEB1, TCF4, TWIST1	22	362	13528	8.49322	0.705831	0.11517	3.04929
GOTERM_BP_FAT	GO:0010605~negative regulation of macromolecule metabolic process	6	22.2222	0.00456194	CAV1, FOXA1, RB1, ZEB1, TCF4, TWIST1	22	734	13528	5.0265	0.92981	0.214555	6.50227
GOTERM_BP_FAT	GO:0016481~negative regulation of transcription	5	18.5185	0.00494636	FOXA1, RB1, ZEB1, TCF4, TWIST1	22	459	13528	6.69836	0.943919	0.213435	7.0318
GOTERM_BP_FAT	GO:0045893~positive regulation of transcription, DNA-dependent	5	18.5185	0.00566761	FOXA1, RB1, ZEB1, ESR2, TCF4	22	477	13528	6.44559	0.9632	0.224323	8.01776
GOTERM_BP_FAT	GO:0051254~positive regulation of RNA metabolic process	5	18.5185	0.00583702	FOXA1, RB1, ZEB1, ESR2, TCF4	22	481	13528	6.39199	0.966668	0.215686	8.24794
GOTERM_BP_FAT	GO:0010629~negative regulation of gene expression	5	18.5185	0.00687788	FOXA1, RB1, ZEB1, TCF4, TWIST1	22	504	13528	6.10029	0.981864	0.221679	9.65035
INTERPRO	IPR011598:Helix-loop-helix DNA-binding	3	11.1111	0.00699044	NEUROG1, TCF4, TWIST1	26	84	16659	22.8832	0.486458	0.486458	7.42111
GOTERM_BP_FAT	GO:0045934~negative regulation of nucleobase, nucleoside, nucleotide and nucleic acid metabolic process	5	18.5185	0.00726725	FOXA1, RB1, ZEB1, TCF4, TWIST1	22	512	13528	6.00497	0.985559	0.220635	10.1698
GOTERM_BP_FAT	GO:0010604~positive regulation of macromolecule metabolic process	6	22.2222	0.00875798	CAV1, FOXA1, RB1, ZEB1, ESR2, TCF4	22	857	13528	4.30508	0.993969	0.235849	12.133
GOTERM_BP_FAT	GO:0010558~negative regulation of macromolecule biosynthetic process	5	18.5185	0.00914428	FOXA1, RB1, ZEB1, TCF4, TWIST1	22	547	13528	5.62074	0.995191	0.234222	12.6352
GOTERM_BP_FAT	GO:0045941~positive regulation of transcription	5	18.5185	0.0101618	FOXA1, RB1, ZEB1, ESR2, TCF4	22	564	13528	5.45132	0.997353	0.246164	13.9451
UP_SEQ_FEATURE	domain:Helix-loop-helix motif	3	11.1111	0.0104386	NEUROG1, TCF4, TWIST1	27	114	19113	18.6287	0.854968	0.854968	12.1665
GOTERM_BP_FAT	GO:0010628~positive regulation of gene expression	5	18.5185	0.0112513	FOXA1, RB1, ZEB1, ESR2, TCF4	22	581	13528	5.29182	0.998604	0.258307	15.3275
INTERPRO	IPR001092:Basic helix-loop-helix dimerisation region bHLH	3	11.1111	0.0125665	NEUROG1, TCF4, TWIST1	26	114	16659	16.8613	0.699222	0.451568	12.9778
SMART	SM00353:HLH	3	11.1111	0.0128878	NEUROG1, TCF4, TWIST1	15	114	9079	15.9281	0.238452	0.238452	9.53055
GOTERM_BP_FAT	GO:0045935~positive regulation of nucleobase, nucleoside, nucleotide and nucleic acid metabolic process	5	18.5185	0.0143414	FOXA1, RB1, ZEB1, ESR2, TCF4	22	624	13528	4.92716	0.999773	0.305733	19.1363
GOTERM_BP_FAT	GO:0051173~positive regulation of nitrogen compound metabolic process	5	18.5185	0.0159481	FOXA1, RB1, ZEB1, ESR2, TCF4	22	644	13528	4.77414	0.999912	0.322393	21.053
GOTERM_BP_FAT	GO:0010557~positive regulation of macromolecule biosynthetic process	5	18.5185	0.016793	FOXA1, RB1, ZEB1, ESR2, TCF4	22	654	13528	4.70114	0.999947	0.325364	22.0439
GOTERM_BP_FAT	GO:0045944~positive regulation of transcription from RNA polymerase II promoter	4	14.8148	0.018861	FOXA1, RB1, ZEB1, ESR2	22	371	13528	6.62975	0.999984	0.32639	24.4205
GOTERM_BP_FAT	GO:0031328~positive regulation of cellular biosynthetic process	5	18.5185	0.0195923	FOXA1, RB1, ZEB1, ESR2, TCF4	22	685	13528	4.48839	0.99999	0.327275	25.2446
UP_SEQ_FEATURE	DNA-binding region:Basic motif	3	11.1111	0.0200755	NEUROG1, TCF4, TWIST1	27	161	19113	13.1905	0.976042	0.845217	22.1753
GOTERM_BP_FAT	GO:0009891~positive regulation of biosynthetic process	5	18.5185	0.0205545	FOXA1, RB1, ZEB1, ESR2, TCF4	22	695	13528	4.42381	0.999994	0.331167	26.3162
GOTERM_MF_FAT	GO:0003712~transcription cofactor activity	4	14.8148	0.0316207	RB1, ZEB1, ESR2, TCF4	26	363	12983	5.50244	0.970825	0.970825	30.4434
SP_PIR_KEYWORDS	activator	4	14.8148	0.0322052	FOXA1, NEUROG1, ZEB1, TCF4	27	520	19235	5.48006	0.9727	0.698894	30.9163
SP_PIR_KEYWORDS	dna-binding	7	25.9259	0.0351026	FOXA1, NEUROG1, RB1, ZEB1, ESR2, TCF4, TWIST1	27	1868	19235	2.66962	0.98037	0.62569	33.2173
GOTERM_MF_FAT	GO:0003700~transcription factor activity	6	22.2222	0.0356194	FOXA1, NEUROG1, RB1, ZEB1, ESR2, TCF4	26	975	12983	3.0729	0.981493	0.86396	33.6203
GOTERM_CC_FAT	GO:0005667~transcription factor complex	3	11.1111	0.0382396	RB1, ZEB1, TCF4	20	210	12782	9.13	0.97122	0.693548	34.6273
GOTERM_BP_FAT	GO:0045596~negative regulation of cell differentiation	3	11.1111	0.0436722	CAV1, ZEB1, TWIST1	22	216	13528	8.5404	1	0.523489	48.1393
GOTERM_BP_FAT	GO:0006355~regulation of transcription, DNA-dependent	7	25.9259	0.047712	FOXA1, NEUROG1, RB1, ZEB1, ESR2, TCF4, TWIST1	22	1773	13528	2.42773	1	0.526436	51.269
SP_PIR_KEYWORDS	transcription regulation	7	25.9259	0.0493618	FOXA1, NEUROG1, RB1, ZEB1, ESR2, TCF4, TWIST1	27	2026	19235	2.46143	0.996183	0.671651	43.5569
GOTERM_BP_FAT	GO:0051252~regulation of RNA metabolic process	7	25.9259	0.0523736	FOXA1, NEUROG1, RB1, ZEB1, ESR2, TCF4, TWIST1	22	1813	13528	2.37417	1	0.542222	54.6614
SP_PIR_KEYWORDS	Transcription	7	25.9259	0.0540145	FOXA1, NEUROG1, RB1, ZEB1, ESR2, TCF4, TWIST1	27	2071	19235	2.40794	0.997775	0.638688	46.6006
GOTERM_MF_FAT	GO:0030528~transcription regulator activity	7	25.9259	0.0627393	FOXA1, NEUROG1, RB1, ZEB1, ESR2, TCF4, TWIST1	26	1512	12983	2.31179	0.999197	0.907058	51.9081
GOTERM_MF_FAT	GO:0003713~transcription coactivator activity	3	11.1111	0.0633095	RB1, ZEB1, ESR2	26	214	12983	7.00018	0.999249	0.834464	52.2377
GOTERM_MF_FAT	GO:0003677~DNA binding	9	33.3333	0.065064	FOXA1, NEUROG1, RB1, ZEB1, LHFP, CXXC5, ESR2, TCF4, TWIST1	26	2331	12983	1.92798	0.999389	0.772385	53.2387
GOTERM_MF_FAT	GO:0008134~transcription factor binding	4	14.8148	0.0741287	RB1, ZEB1, ESR2, TCF4	26	513	12983	3.89354	0.999791	0.756353	58.1129
SP_PIR_KEYWORDS	DNA binding	3	11.1111	0.0766745	RB1, ZEB1, TWIST1	27	340	19235	6.28595	0.999845	0.584182	59.3959
GOTERM_BP_FAT	GO:0048598~embryonic morphogenesis	3	11.1111	0.081245	NEUROG1, ZEB1, TWIST1	22	307	13528	6.00888	1	0.68175	71.2338
GOTERM_BP_FAT	GO:0006350~transcription	7	25.9259	0.0945108	FOXA1, NEUROG1, RB1, ZEB1, ESR2, TCF4, TWIST1	22	2101	13528	2.04872	1	0.714624	76.7724
GOTERM_BP_FAT	GO:0042592~homeostatic process	4	14.8148	0.107847	CAV1, ERBB4, FOXA1, RB1	22	751	13528	3.27515	1	0.741566	81.3255
SP_PIR_KEYWORDS	repressor	3	11.1111	0.116295	FOXA1, RB1, ZEB1	27	435	19235	4.91315	0.999999	0.678029	75.2619
GOTERM_MF_FAT	GO:0016564~transcription repressor activity	3	11.1111	0.122937	RB1, ZEB1, TCF4	26	316	12983	4.74063	0.999999	0.872717	77.2831
GOTERM_MF_FAT	GO:0016563~transcription activator activity	3	11.1111	0.186092	RB1, ZEB1, ESR2	26	410	12983	3.65375	1	0.94106	90.2353
GOTERM_CC_FAT	GO:0044451~nucleoplasm part	3	11.1111	0.198664	RB1, ZEB1, TCF4	20	555	12782	3.45459	1	0.893473	91.0588
GOTERM_BP_FAT	GO:0045449~regulation of transcription	7	25.9259	0.202927	FOXA1, NEUROG1, RB1, ZEB1, ESR2, TCF4, TWIST1	22	2601	13528	1.65489	1	0.90493	96.4387
GOTERM_MF_FAT	GO:0043565~sequence-specific DNA binding	3	11.1111	0.32755	FOXA1, ZEB1, ESR2	26	607	12983	2.46794	1	0.981094	98.8706
SP_PIR_KEYWORDS	nucleus	8	29.6296	0.354443	FOXA1, NEUROG1, RB1, ZEB1, CXXC5, ESR2, TCF4, TWIST1	27	4283	19235	1.33067	1	0.920636	99.2878
GOTERM_CC_FAT	GO:0005654~nucleoplasm	3	11.1111	0.381033	RB1, ZEB1, TCF4	20	882	12782	2.17381	1	0.973689	99.4645
GOTERM_CC_FAT	GO:0031981~nuclear lumen	3	11.1111	0.651956	RB1, ZEB1, TCF4	20	1450	12782	1.32228	1	0.995184	99.999
GOTERM_CC_FAT	GO:0070013~intracellular organelle lumen	3	11.1111	0.764096	RB1, ZEB1, TCF4	20	1779	12782	1.07774	1	0.99901	100
GOTERM_CC_FAT	GO:0043233~organelle lumen	3	11.1111	0.775804	RB1, ZEB1, TCF4	20	1820	12782	1.05346	1	0.998465	100
GOTERM_CC_FAT	GO:0031974~membrane-enclosed lumen	3	11.1111	0.785696	RB1, ZEB1, TCF4	20	1856	12782	1.03303	1	0.99829	100
Annotation Cluster 2	Enrichment Score: 1.5528293380657547
Category	Term	Count	%	PValue	Genes	List Total	Pop Hits	Pop Total	Fold Enrichment	Bonferroni	Benjamini	FDR
GOTERM_BP_FAT	GO:0007017~microtubule-based process	4	14.8148	0.00670111	CAV1, STMN3, MAPT, DYNLRB2	22	253	13528	9.72188	0.979888	0.22928	9.4136
GOTERM_BP_FAT	GO:0051493~regulation of cytoskeleton organization	3	11.1111	0.0185936	CAV1, STMN3, MAPT	22	136	13528	13.5642	0.999982	0.332272	24.1171
GOTERM_BP_FAT	GO:0000226~microtubule cytoskeleton organization	3	11.1111	0.0215143	CAV1, STMN3, MAPT	22	147	13528	12.5492	0.999997	0.334768	27.3708
GOTERM_BP_FAT	GO:0033043~regulation of organelle organization	3	11.1111	0.0440377	CAV1, STMN3, MAPT	22	217	13528	8.50105	1	0.516568	48.43
GOTERM_BP_FAT	GO:0007010~cytoskeleton organization	3	11.1111	0.145811	CAV1, STMN3, MAPT	22	436	13528	4.23103	1	0.822304	90.1473
Annotation Cluster 3	Enrichment Score: 1.3645001038299729
Category	Term	Count	%	PValue	Genes	List Total	Pop Hits	Pop Total	Fold Enrichment	Bonferroni	Benjamini	FDR
GOTERM_BP_FAT	GO:0042127~regulation of cell proliferation	7	25.9259	0.000970326	CAV1, FGFR4, LEPRE1, ERBB4, RB1, ZEB1, ESR2	22	787	13528	5.46933	0.43109	0.171394	1.41734
GOTERM_BP_FAT	GO:0048545~response to steroid hormone stimulus	3	11.1111	0.03526	CAV1, ERBB4, ESR2	22	192	13528	9.60795	1	0.478866	41.0117
GOTERM_BP_FAT	GO:0009725~response to hormone stimulus	3	11.1111	0.109961	CAV1, ERBB4, ESR2	22	367	13528	5.0265	1	0.741695	81.9657
GOTERM_BP_FAT	GO:0009719~response to endogenous stimulus	3	11.1111	0.129386	CAV1, ERBB4, ESR2	22	405	13528	4.55488	1	0.787348	86.9627
GOTERM_BP_FAT	GO:0010033~response to organic substance	3	11.1111	0.309154	CAV1, ERBB4, ESR2	22	721	13528	2.55857	1	0.973799	99.5653
Annotation Cluster 4	Enrichment Score: 1.2595692244234689
Category	Term	Count	%	PValue	Genes	List Total	Pop Hits	Pop Total	Fold Enrichment	Bonferroni	Benjamini	FDR
GOTERM_BP_FAT	GO:0001558~regulation of cell growth	3	11.1111	0.0359338	MAPT, RB1, ESR2	22	194	13528	9.5089	1	0.474969	41.6146
GOTERM_BP_FAT	GO:0008361~regulation of cell size	3	11.1111	0.0400817	MAPT, RB1, ESR2	22	206	13528	8.95499	1	0.502933	45.2014
GOTERM_BP_FAT	GO:0032535~regulation of cellular component size	3	11.1111	0.0654079	MAPT, RB1, ESR2	22	271	13528	6.80711	1	0.616563	63.0153
GOTERM_BP_FAT	GO:0040008~regulation of growth	3	11.1111	0.097195	MAPT, RB1, ESR2	22	341	13528	5.40976	1	0.709931	77.7646
Annotation Cluster 5	Enrichment Score: 1.1629026989560556
Category	Term	Count	%	PValue	Genes	List Total	Pop Hits	Pop Total	Fold Enrichment	Bonferroni	Benjamini	FDR
GOTERM_CC_FAT	GO:0005578~proteinaceous extracellular matrix	5	18.5185	0.00110962	FLRT2, LEPRE1, FBN1, ANGPTL4, MMP11	20	320	12782	9.98594	0.0960958	0.0960958	1.20308
GOTERM_CC_FAT	GO:0031012~extracellular matrix	5	18.5185	0.00146611	FLRT2, LEPRE1, FBN1, ANGPTL4, MMP11	20	345	12782	9.26232	0.124984	0.0645774	1.58679
SP_PIR_KEYWORDS	extracellular matrix	4	14.8148	0.00408186	LEPRE1, FBN1, ANGPTL4, MMP11	27	241	19235	11.8242	0.362323	0.362323	4.51608
GOTERM_CC_FAT	GO:0044421~extracellular region part	5	18.5185	0.0494845	FLRT2, LEPRE1, FBN1, ANGPTL4, MMP11	20	960	12782	3.32865	0.990131	0.684811	42.494
SP_PIR_KEYWORDS	signal	9	33.3333	0.0592962	FLRT2, FGFR4, LEPRE1, ERBB4, PVRL3, FBN1, LHFP, ANGPTL4, MMP11	27	3250	19235	1.97282	0.998798	0.568504	49.8739
UP_SEQ_FEATURE	signal peptide	9	33.3333	0.0612082	FLRT2, FGFR4, LEPRE1, ERBB4, PVRL3, FBN1, LHFP, ANGPTL4, MMP11	27	3250	19113	1.96031	0.999991	0.945275	54.1982
UP_SEQ_FEATURE	disulfide bond	7	25.9259	0.174763	FGFR4, ERBB4, PVRL3, MAPT, FBN1, ANGPTL4, MMP11	27	2819	19113	1.75779	1	0.993585	90.6955
SP_PIR_KEYWORDS	disulfide bond	7	25.9259	0.193114	FGFR4, ERBB4, PVRL3, MAPT, FBN1, ANGPTL4, MMP11	27	2924	19235	1.70549	1	0.792688	91.1459
GOTERM_CC_FAT	GO:0005576~extracellular region	5	18.5185	0.34921	FLRT2, LEPRE1, FBN1, ANGPTL4, MMP11	20	2010	12782	1.5898	1	0.971381	99.075
SP_PIR_KEYWORDS	glycoprotein	8	29.6296	0.362991	FLRT2, FGFR4, LEPRE1, ERBB4, PVRL3, MAPT, FBN1, ANGPTL4	27	4318	19235	1.31988	1	0.90579	99.3874
SP_PIR_KEYWORDS	Secreted	4	14.8148	0.40286	LEPRE1, FBN1, ANGPTL4, MMP11	27	1689	19235	1.68717	1	0.91507	99.7048
UP_SEQ_FEATURE	glycosylation site:N-linked (GlcNAc...)	7	25.9259	0.503738	FLRT2, FGFR4, LEPRE1, ERBB4, PVRL3, FBN1, ANGPTL4	27	4129	19113	1.2001	1	0.999997	99.9827
UP_SEQ_FEATURE	topological domain:Extracellular	4	14.8148	0.736473	FLRT2, FGFR4, ERBB4, PVRL3	27	2719	19113	1.0414	1	1	100
Annotation Cluster 6	Enrichment Score: 1.143403918221812
Category	Term	Count	%	PValue	Genes	List Total	Pop Hits	Pop Total	Fold Enrichment	Bonferroni	Benjamini	FDR
GOTERM_BP_FAT	GO:0048732~gland development	3	11.1111	0.0183372	CAV1, ERBB4, FOXA1	22	135	13528	13.6646	0.999979	0.338715	23.825
GOTERM_BP_FAT	GO:0042592~homeostatic process	4	14.8148	0.107847	CAV1, ERBB4, FOXA1, RB1	22	751	13528	3.27515	1	0.741566	81.3255
GOTERM_BP_FAT	GO:0048878~chemical homeostasis	3	11.1111	0.187778	CAV1, ERBB4, FOXA1	22	512	13528	3.60298	1	0.888869	95.3028
Annotation Cluster 7	Enrichment Score: 0.3959416842434606
Category	Term	Count	%	PValue	Genes	List Total	Pop Hits	Pop Total	Fold Enrichment	Bonferroni	Benjamini	FDR
GOTERM_CC_FAT	GO:0044430~cytoskeletal part	4	14.8148	0.164272	ERBB4, MAPT, RB1, DYNLRB2	20	952	12782	2.68529	1	0.934236	85.8629
GOTERM_CC_FAT	GO:0015630~microtubule cytoskeleton	3	11.1111	0.195389	MAPT, RB1, DYNLRB2	20	549	12782	3.49235	1	0.915658	90.6522
GOTERM_CC_FAT	GO:0005856~cytoskeleton	4	14.8148	0.338156	ERBB4, MAPT, RB1, DYNLRB2	20	1381	12782	1.85112	1	0.976618	98.8885
SP_PIR_KEYWORDS	acetylation	5	18.5185	0.485505	BLVRA, CAV1, MAPT, RB1, DYNLRB2	27	2635	19235	1.35182	1	0.952449	99.9452
UP_SEQ_FEATURE	mutagenesis site	4	14.8148	0.536958	ERBB4, NAT1, MAPT, RB1	27	2045	19113	1.38462	1	0.999997	99.9927
GOTERM_CC_FAT	GO:0043232~intracellular non-membrane-bounded organelle	4	14.8148	0.7733	ERBB4, MAPT, RB1, DYNLRB2	20	2596	12782	0.984746	1	0.998832	100
GOTERM_CC_FAT	GO:0043228~non-membrane-bounded organelle	4	14.8148	0.7733	ERBB4, MAPT, RB1, DYNLRB2	20	2596	12782	0.984746	1	0.998832	100
Annotation Cluster 8	Enrichment Score: 0.38572547892838766
Category	Term	Count	%	PValue	Genes	List Total	Pop Hits	Pop Total	Fold Enrichment	Bonferroni	Benjamini	FDR
GOTERM_CC_FAT	GO:0044459~plasma membrane part	7	25.9259	0.0938511	FLRT2, CAV1, FGFR4, ERBB4, WNK4, PVRL3, MAPT	20	2203	12782	2.03073	0.999873	0.833647	65.8498
UP_SEQ_FEATURE	domain:Protein kinase	3	11.1111	0.132923	FGFR4, ERBB4, WNK4	27	469	19113	4.52807	1	0.994746	82.8514
INTERPRO	IPR017441:Protein kinase, ATP binding site	3	11.1111	0.148206	FGFR4, ERBB4, WNK4	26	455	16659	4.2246	1	0.993778	82.8511
INTERPRO	IPR000719:Protein kinase, core	3	11.1111	0.159224	FGFR4, ERBB4, WNK4	26	476	16659	4.03822	1	0.983739	85.1379
UP_SEQ_FEATURE	binding site:ATP	3	11.1111	0.167422	FGFR4, ERBB4, WNK4	27	542	19113	3.9182	1	0.996372	89.6191
GOTERM_CC_FAT	GO:0030054~cell junction	3	11.1111	0.178609	CAV1, WNK4, PVRL3	20	518	12782	3.70135	1	0.922528	88.2935
UP_SEQ_FEATURE	active site:Proton acceptor	3	11.1111	0.224969	FGFR4, ERBB4, WNK4	27	658	19113	3.22746	1	0.997153	95.7176
SP_PIR_KEYWORDS	kinase	3	11.1111	0.237958	FGFR4, ERBB4, WNK4	27	688	19235	3.10643	1	0.845615	95.3595
GOTERM_BP_FAT	GO:0006468~protein amino acid phosphorylation	3	11.1111	0.277518	FGFR4, ERBB4, WNK4	22	667	13528	2.76571	1	0.961467	99.1602
SP_PIR_KEYWORDS	transferase	4	14.8148	0.290668	FGFR4, ERBB4, WNK4, NAT1	27	1394	19235	2.04421	1	0.89163	97.9353
GOTERM_MF_FAT	GO:0004672~protein kinase activity	3	11.1111	0.326831	FGFR4, ERBB4, WNK4	26	606	12983	2.47201	1	0.987136	98.8569
GOTERM_MF_FAT	GO:0042802~identical protein binding	3	11.1111	0.351181	CAV1, PVRL3, MAPT	26	640	12983	2.34069	1	0.97428	99.2461
GOTERM_BP_FAT	GO:0016310~phosphorylation	3	11.1111	0.355094	FGFR4, ERBB4, WNK4	22	800	13528	2.30591	1	0.985702	99.8419
UP_SEQ_FEATURE	nucleotide phosphate-binding region:ATP	3	11.1111	0.379088	FGFR4, ERBB4, WNK4	27	962	19113	2.20755	1	0.999941	99.7238
GOTERM_BP_FAT	GO:0006793~phosphorus metabolic process	3	11.1111	0.452113	FGFR4, ERBB4, WNK4	22	973	13528	1.89592	1	0.996756	99.9856
GOTERM_BP_FAT	GO:0006796~phosphate metabolic process	3	11.1111	0.452113	FGFR4, ERBB4, WNK4	22	973	13528	1.89592	1	0.996756	99.9856
GOTERM_CC_FAT	GO:0005886~plasma membrane	7	25.9259	0.508844	FLRT2, CAV1, FGFR4, ERBB4, WNK4, PVRL3, MAPT	20	3777	12782	1.18446	1	0.990162	99.957
SP_PIR_KEYWORDS	atp-binding	3	11.1111	0.543491	FGFR4, ERBB4, WNK4	27	1326	19235	1.61178	1	0.968262	99.9858
UP_SEQ_FEATURE	splice variant	11	40.7407	0.596691	CAV1, FGFR4, LEPRE1, ERBB4, ADHFE1, WNK4, PVRL3, MAPT, CXXC5, ESR2, TCF4	27	7458	19113	1.04408	1	0.999999	99.9987
SP_PIR_KEYWORDS	nucleotide-binding	3	11.1111	0.678107	FGFR4, ERBB4, WNK4	27	1686	19235	1.26763	1	0.990129	99.9997
GOTERM_MF_FAT	GO:0005524~ATP binding	3	11.1111	0.794726	FGFR4, ERBB4, WNK4	26	1477	12983	1.01424	1	0.999896	100
GOTERM_MF_FAT	GO:0032559~adenyl ribonucleotide binding	3	11.1111	0.801177	FGFR4, ERBB4, WNK4	26	1497	12983	1.00069	1	0.999861	100
SP_PIR_KEYWORDS	cell membrane	3	11.1111	0.813682	CAV1, PVRL3, MAPT	27	2194	19235	0.974121	1	0.996306	100
GOTERM_MF_FAT	GO:0030554~adenyl nucleotide binding	3	11.1111	0.825308	FGFR4, ERBB4, WNK4	26	1577	12983	0.949929	1	0.999893	100
GOTERM_MF_FAT	GO:0001883~purine nucleoside binding	3	11.1111	0.832045	FGFR4, ERBB4, WNK4	26	1601	12983	0.935689	1	0.999866	100
GOTERM_MF_FAT	GO:0001882~nucleoside binding	3	11.1111	0.835059	FGFR4, ERBB4, WNK4	26	1612	12983	0.929304	1	0.999819	100
GOTERM_MF_FAT	GO:0032553~ribonucleotide binding	3	11.1111	0.887086	FGFR4, ERBB4, WNK4	26	1836	12983	0.815925	1	0.999954	100
GOTERM_MF_FAT	GO:0032555~purine ribonucleotide binding	3	11.1111	0.887086	FGFR4, ERBB4, WNK4	26	1836	12983	0.815925	1	0.999954	100
GOTERM_MF_FAT	GO:0017076~purine nucleotide binding	3	11.1111	0.902176	FGFR4, ERBB4, WNK4	26	1918	12983	0.781042	1	0.999964	100
GOTERM_MF_FAT	GO:0000166~nucleotide binding	3	11.1111	0.946088	FGFR4, ERBB4, WNK4	26	2245	12983	0.667278	1	0.999996	100
Annotation Cluster 9	Enrichment Score: 0.27287469423401794
Category	Term	Count	%	PValue	Genes	List Total	Pop Hits	Pop Total	Fold Enrichment	Bonferroni	Benjamini	FDR
GOTERM_CC_FAT	GO:0044459~plasma membrane part	7	25.9259	0.0938511	FLRT2, CAV1, FGFR4, ERBB4, WNK4, PVRL3, MAPT	20	2203	12782	2.03073	0.999873	0.833647	65.8498
SP_PIR_KEYWORDS	receptor	4	14.8148	0.362596	FGFR4, ERBB4, PVRL3, ESR2	27	1583	19235	1.80015	1	0.916	99.3831
SP_PIR_KEYWORDS	glycoprotein	8	29.6296	0.362991	FLRT2, FGFR4, LEPRE1, ERBB4, PVRL3, MAPT, FBN1, ANGPTL4	27	4318	19235	1.31988	1	0.90579	99.3874
GOTERM_CC_FAT	GO:0005886~plasma membrane	7	25.9259	0.508844	FLRT2, CAV1, FGFR4, ERBB4, WNK4, PVRL3, MAPT	20	3777	12782	1.18446	1	0.990162	99.957
GOTERM_CC_FAT	GO:0005887~integral to plasma membrane	3	11.1111	0.5384	FLRT2, CAV1, FGFR4	20	1188	12782	1.61389	1	0.990812	99.9781
GOTERM_CC_FAT	GO:0031226~intrinsic to plasma membrane	3	11.1111	0.551085	FLRT2, CAV1, FGFR4	20	1215	12782	1.57802	1	0.989488	99.9839
UP_SEQ_FEATURE	transmembrane region	7	25.9259	0.692017	FLRT2, CAV1, FGFR4, TMEM45B, ERBB4, PVRL3, LHFP	27	4911	19113	1.009	1	1	100
UP_SEQ_FEATURE	topological domain:Cytoplasmic	5	18.5185	0.698112	FLRT2, CAV1, FGFR4, ERBB4, PVRL3	27	3374	19113	1.04904	1	1	100
SP_PIR_KEYWORDS	transmembrane	7	25.9259	0.69847	FLRT2, CAV1, FGFR4, TMEM45B, ERBB4, PVRL3, LHFP	27	4973	19235	1.00279	1	0.987672	99.9999
UP_SEQ_FEATURE	topological domain:Extracellular	4	14.8148	0.736473	FLRT2, FGFR4, ERBB4, PVRL3	27	2719	19113	1.0414	1	1	100
SP_PIR_KEYWORDS	membrane	8	29.6296	0.79112	FLRT2, CAV1, FGFR4, TMEM45B, ERBB4, PVRL3, MAPT, LHFP	27	6256	19235	0.911007	1	0.995407	100
GOTERM_CC_FAT	GO:0016021~integral to membrane	7	25.9259	0.866585	FLRT2, CAV1, FGFR4, TMEM45B, ERBB4, PVRL3, LHFP	20	5297	12782	0.844572	1	0.999654	100
GOTERM_CC_FAT	GO:0031224~intrinsic to membrane	7	25.9259	0.892403	FLRT2, CAV1, FGFR4, TMEM45B, ERBB4, PVRL3, LHFP	20	5485	12782	0.815624	1	0.999787	100
Annotation Cluster 10	Enrichment Score: 0.22513471746811375
Category	Term	Count	%	PValue	Genes	List Total	Pop Hits	Pop Total	Fold Enrichment	Bonferroni	Benjamini	FDR
SP_PIR_KEYWORDS	zinc	5	18.5185	0.342681	BLVRA, ZEB1, CXXC5, ESR2, MMP11	27	2189	19235	1.62724	1	0.923014	99.1266
SP_PIR_KEYWORDS	metal-binding	6	22.2222	0.374354	BLVRA, LEPRE1, ZEB1, CXXC5, ESR2, MMP11	27	2972	19235	1.43824	1	0.904139	99.5001
GOTERM_MF_FAT	GO:0046914~transition metal ion binding	6	22.2222	0.647816	BLVRA, LEPRE1, ZEB1, CXXC5, ESR2, MMP11	26	2785	12983	1.07579	1	0.999725	99.9992
GOTERM_MF_FAT	GO:0008270~zinc ion binding	5	18.5185	0.673932	BLVRA, ZEB1, CXXC5, ESR2, MMP11	26	2311	12983	1.08037	1	0.99973	99.9997
SP_PIR_KEYWORDS	zinc-finger	3	11.1111	0.688465	ZEB1, CXXC5, ESR2	27	1718	19235	1.24402	1	0.98801	99.9998
GOTERM_MF_FAT	GO:0046872~metal ion binding	8	29.6296	0.730636	BLVRA, LEPRE1, ADHFE1, FBN1, ZEB1, CXXC5, ESR2, MMP11	26	4140	12983	0.96492	1	0.999879	100
GOTERM_MF_FAT	GO:0043169~cation binding	8	29.6296	0.741098	BLVRA, LEPRE1, ADHFE1, FBN1, ZEB1, CXXC5, ESR2, MMP11	26	4179	12983	0.955915	1	0.999841	100
GOTERM_MF_FAT	GO:0043167~ion binding	8	29.6296	0.757223	BLVRA, LEPRE1, ADHFE1, FBN1, ZEB1, CXXC5, ESR2, MMP11	26	4241	12983	0.94194	1	0.999825	100

## Sheet: SAM.ResponseVSNOResponse
TWO CLASS UNPAIRED SAM ANALYSIS
Group2: Partial Response
Group1: Stable disease or tumor progression
Gene ID	Score(d)	Numerator(r)	Denominator(s+s0)	Fold Change	q-value(%)
CEP55	1.27516	1.01396	0.795159	2.01944	66.1664
MELK	1.18611	1.14677	0.966831	2.21417	66.1664
CENPF	1.17777	1.32586	1.12573	2.50682	66.1664
UBE2C	1.08931	0.928732	0.852588	1.9036	66.1664
NDC80	1.06121	1.1594	1.09253	2.23365	66.1664
CLDN7	0.992209	0.986861	0.99461	1.98187	66.1664
EXO1	0.976753	0.98225	1.00563	1.97554	66.1664
BCL2	0.918163	0.985768	1.07363	1.98037	66.1664
TYMS	0.914296	0.872982	0.954814	1.83144	66.1664
NUF2	0.857544	1.05881	1.2347	2.08322	66.1664
NDRG1	0.838829	0.787819	0.939189	1.72646	66.1664
DSP	0.804762	0.598669	0.743909	1.51432	66.1664
KRT14	0.788947	1.69896	2.15345	3.24666	66.1664
CCNB1	0.772524	0.655886	0.849017	1.57558	66.1664
ANLN	0.735424	0.790767	1.07525	1.72999	66.1664
UBE2T	0.649281	0.662316	1.02008	1.58262	66.1664
KRT17	0.63085	0.909502	1.44171	1.8784	66.1664
CD24	0.627452	0.518392	0.826186	1.43236	66.1664
RAB25	0.620744	0.594746	0.958119	1.51021	66.1664
KRT8	0.620085	0.50272	0.810727	1.41688	66.1664
PTTG1	0.594678	0.588745	0.990023	1.50394	66.3821
JUP	0.57913	0.403641	0.696977	1.32284	66.3821
RRM2	0.513691	0.480678	0.935733	1.3954	66.8771
MYC	0.508506	0.391424	0.769753	1.31169	66.8771
KIF2C	0.500153	0.413647	0.827042	1.33205	66.8771
ESRP1	0.491803	0.367937	0.74814	1.29051	66.8771
CDC20	0.479734	0.487089	1.01533	1.40161	66.8771
CRYAB	0.458486	0.464054	1.01214	1.37941	66.8771
FABP5	0.443927	0.447466	1.00797	1.36364	66.8771
GAL	0.386786	0.501604	1.29685	1.41579	66.8771
CDC6	0.324976	0.30992	0.953669	1.23964	66.8771
EPCAM	0.281747	0.244757	0.868714	1.18489	66.8771
GRB7	0.265914	0.246915	0.92855	1.18667	66.8771
F11R	0.263749	0.182643	0.692488	1.13496	66.8771
MIA	0.228171	0.425774	1.86603	1.34329	66.8771
VEGFA	0.194137	0.176182	0.907518	1.12989	66.8771
BIRC5	0.184986	0.158199	0.855193	1.11589	66.8771
HDAC	0.182764	0.213426	1.16777	1.15944	66.8771
SLC39A6	0.179524	0.133553	0.743925	1.09699	66.8771
MYBL2	0.167835	0.164204	0.978362	1.12055	66.8771
MKI67	0.165887	0.166391	1.00304	1.12225	66.8771
SFRP1	0.145128	0.224239	1.54511	1.16816	66.8771
ACTR3B	0.117568	0.0839393	0.713963	1.05991	66.8771
POU3F2	0.111555	0.199688	1.79005	1.14845	66.8771
DDIT4	0.0963152	0.0878556	0.912167	1.06279	66.8771
BAG1	0.0939511	0.108032	1.14987	1.07776	66.8771
MDM2	0.0779798	0.0604202	0.774818	1.04277	66.8771
SPINT1	0.0753904	0.0601432	0.797756	1.04257	66.8771
VIM	0.0560186	0.0509834	0.910115	1.03597	66.8771
PIK3CA	0.0496747	0.0364602	0.733979	1.02559	66.8771
CLDN3	0.0408934	0.0460484	1.12606	1.03243	66.8771
PNP	0.0401437	0.0307216	0.765291	1.02152	66.8771
CCNE1	0.00421393	0.00455799	1.08165	1.00316	66.8771
MMP11	-1.77273	-2.37718	1.34097	0.192485	16.6215
CXXC5	-1.51508	-1.19082	0.785974	0.438055	16.6215
FOXA1	-1.38899	-2.41034	1.73532	0.188111	16.6215
LEPRE1	-1.36676	-1.2372	0.905202	0.424196	16.6215
TMEM45B	-1.30588	-2.20033	1.68494	0.217588	16.6215
CAV1	-1.21495	-1.52863	1.25819	0.346607	16.6215
GATA3	-1.18584	-1.46946	1.23917	0.361118	16.6215
PIF	-1.18119	-2.09991	1.77779	0.233272	16.6215
DYNLRB2	-1.16766	-1.98789	1.70246	0.252107	16.6215
FBN1	-1.16566	-1.26168	1.08237	0.417057	16.6215
BLVRA	-1.11935	-0.856059	0.764784	0.55246	16.6215
ANGPTL4	-1.1164	-1.29281	1.15802	0.408156	16.6215
ZEB1	-1.11456	-1.0986	0.985678	0.46697	16.6215
RB1	-1.1104	-0.928231	0.835941	0.525502	16.6215
STMN3	-1.08017	-1.16521	1.07872	0.445901	16.6215
MAPT	-1.04234	-1.60304	1.53792	0.329184	16.6215
TWIST1	-1.03667	-1.34311	1.2956	0.39417	16.6215
LHFP	-1.00257	-1.0381	1.03544	0.486969	16.6215
TCF4	-0.976993	-0.902079	0.923322	0.535115	16.6215
TMEM158	-0.955965	-1.26696	1.32532	0.415535	16.6215
FLRT2	-0.923201	-1.30896	1.41785	0.403612	16.6215
NEUROG1	-0.919705	-1.73591	1.88747	0.300219	16.6215
ESR2	-0.891256	-1.38679	1.55599	0.382415	21.3705
ERBB4	-0.857137	-1.38846	1.61989	0.381971	21.3705
ADHFE1	-0.854018	-1.39793	1.63689	0.379472	21.3705
NAT1	-0.848187	-1.12582	1.32732	0.458242	21.3705
INPP4B	-0.842395	-1.22804	1.45779	0.426898	21.3705
PVRL3	-0.823683	-0.8728	1.05963	0.546086	21.3705
MLPH	-0.78157	-1.07445	1.37474	0.474851	24.9322
AXL	-0.775602	-0.643894	0.830186	0.639983	24.9322
PGR	-0.721029	-1.10906	1.53817	0.463595	28.0488
WNK4	-0.711646	-1.20374	1.69149	0.434149	28.0488
GNG11	-0.671158	-0.742975	1.107	0.597506	28.0488
SLC16A3	-0.617353	-0.504525	0.817239	0.704893	36.4394
GPR160	-0.614238	-0.798388	1.2998	0.574991	36.4394
MET	-0.60446	-0.683178	1.13023	0.622792	36.4394
UCHL1	-0.591923	-0.69201	1.16909	0.618991	36.4394
FGFR4	-0.584501	-0.887667	1.51867	0.540487	36.4394
RAD17	-0.581981	-0.492896	0.846929	0.710597	36.4394
FLVCR2	-0.512784	-0.709603	1.38382	0.611488	36.4394
EGFR	-0.501195	-0.477385	0.952493	0.718278	46.374
CDH3	-0.490481	-0.522748	1.06579	0.696045	46.374
ERBB3	-0.48309	-0.471916	0.976869	0.721007	46.374
BRCA1	-0.479182	-0.613153	1.27958	0.653766	46.374
HSD17B4	-0.477143	-0.38162	0.799801	0.767575	46.374
NT5E	-0.475904	-0.529476	1.11257	0.692806	46.374
EVI2A	-0.47425	-0.645711	1.36154	0.639178	46.374
GRHL2	-0.465779	-0.397165	0.85269	0.759349	46.374
VAMP8	-0.460257	-0.343967	0.747338	0.787872	46.374
GSTP1	-0.438006	-0.379661	0.866796	0.768618	46.374
RAD50	-0.420213	-0.416904	0.992127	0.74903	46.374
RRAGD	-0.409786	-0.393814	0.961023	0.761115	46.374
KRT19	-0.387632	-0.348985	0.900298	0.785136	49.4193
SPINT2	-0.381907	-0.321385	0.841526	0.800301	49.4193
DDR1	-0.376834	-0.272552	0.723267	0.827854	49.4193
SH2B3	-0.352977	-0.297202	0.841986	0.813829	49.4193
KRT5	-0.231333	-0.351265	1.51844	0.783896	64.48
EMP3	-0.225194	-0.222394	0.987565	0.857142	64.48
ADM	-0.17633	-0.177819	1.00845	0.884038	64.48
PLOD1	-0.172439	-0.139977	0.811746	0.907534	64.48
ESR1	-0.155851	-0.24834	1.59344	0.841865	64.48
FOXC1	-0.0791874	-0.0940914	1.18821	0.936862	64.48
RASSF1A	-0.0740212	-0.0596882	0.806366	0.959471	64.48
MPP1	-0.0618325	-0.0666241	1.07749	0.95487	64.48
ERBB2	-0.0528203	-0.0443355	0.839364	0.969736	64.48
ORC6L	-0.0331711	-0.0396251	1.19457	0.972908	64.48
HSD17B8	-0.0307001	-0.0315762	1.02854	0.978351	64.48
PHGDH	-0.00997846	-0.0136358	1.36653	0.990593	64.48
CLDN4	-0.00418524	-0.00412953	0.986687	0.997142	64.48
PTEN	-0.000454178	-0.000436241	0.960506	0.999698	64.48

## Sheet: GO.DOWN.ResponseVSNOResponse
DAVID ONLINE TOOL
Genes Downregulated in Responders compared to those that showed stable disease
FDR<25%
Annotation Cluster 1	Enrichment Score: 2.0755694991538043
Category	Term	Count	%	PValue	Genes	List Total	Pop Hits	Pop Total	Fold Enrichment	Bonferroni	Benjamini	FDR
GOTERM_BP_FAT	GO:0006357~regulation of transcription from RNA polymerase II promoter	7	24.1379	0.000838476	FOXA1, NEUROG1, RB1, ZEB1, ESR2, TCF4, TWIST1	23	727	13528	5.6633	0.392925	0.22085	1.22984
INTERPRO	IPR011598:Helix-loop-helix DNA-binding	3	10.3448	0.00754833	NEUROG1, TCF4, TWIST1	27	84	16659	22.0357	0.513156	0.513156	7.99124
UP_SEQ_FEATURE	domain:Helix-loop-helix motif	3	10.3448	0.0120473	NEUROG1, TCF4, TWIST1	29	114	19113	17.3439	0.904761	0.904761	14.0289
INTERPRO	IPR001092:Basic helix-loop-helix dimerisation region bHLH	3	10.3448	0.0135534	NEUROG1, TCF4, TWIST1	27	114	16659	16.2368	0.72648	0.477009	13.9291
SMART	SM00353:HLH	3	10.3448	0.0147496	NEUROG1, TCF4, TWIST1	16	114	9079	14.9326	0.268054	0.268054	10.8398
UP_SEQ_FEATURE	DNA-binding region:Basic motif	3	10.3448	0.0230952	NEUROG1, TCF4, TWIST1	29	161	19113	12.2808	0.989252	0.896327	25.279
Annotation Cluster 2	Enrichment Score: 1.7567005064883567
Category	Term	Count	%	PValue	Genes	List Total	Pop Hits	Pop Total	Fold Enrichment	Bonferroni	Benjamini	FDR
GOTERM_BP_FAT	GO:0048545~response to steroid hormone stimulus	4	13.7931	0.00355291	CAV1, ERBB4, GATA3, ESR2	23	192	13528	12.2536	0.879697	0.20967	5.11523
GOTERM_BP_FAT	GO:0042127~regulation of cell proliferation	6	20.6897	0.00756378	CAV1, LEPRE1, ERBB4, RB1, ZEB1, ESR2	23	787	13528	4.48417	0.989084	0.275796	10.5962
GOTERM_BP_FAT	GO:0009725~response to hormone stimulus	4	13.7931	0.0208048	CAV1, ERBB4, GATA3, ESR2	23	367	13528	6.41061	0.999996	0.350375	26.6668
GOTERM_BP_FAT	GO:0009719~response to endogenous stimulus	4	13.7931	0.0268895	CAV1, ERBB4, GATA3, ESR2	23	405	13528	5.80913	1	0.362696	33.1095
GOTERM_BP_FAT	GO:0010033~response to organic substance	4	13.7931	0.109504	CAV1, ERBB4, GATA3, ESR2	23	721	13528	3.2631	1	0.748451	81.9301
Annotation Cluster 3	Enrichment Score: 1.6052483339905832
Category	Term	Count	%	PValue	Genes	List Total	Pop Hits	Pop Total	Fold Enrichment	Bonferroni	Benjamini	FDR
GOTERM_BP_FAT	GO:0000122~negative regulation of transcription from RNA polymerase II promoter	5	17.2414	0.000808521	FOXA1, RB1, ZEB1, TCF4, TWIST1	23	266	13528	11.0559	0.381998	0.381998	1.18615
GOTERM_BP_FAT	GO:0006357~regulation of transcription from RNA polymerase II promoter	7	24.1379	0.000838476	FOXA1, NEUROG1, RB1, ZEB1, ESR2, TCF4, TWIST1	23	727	13528	5.6633	0.392925	0.22085	1.22984
GOTERM_BP_FAT	GO:0051172~negative regulation of nitrogen compound metabolic process	6	20.6897	0.00124803	CAV1, FOXA1, RB1, ZEB1, TCF4, TWIST1	23	519	13528	6.7997	0.524335	0.219391	1.82542
GOTERM_BP_FAT	GO:0031327~negative regulation of cellular biosynthetic process	6	20.6897	0.00176359	CAV1, FOXA1, RB1, ZEB1, TCF4, TWIST1	23	561	13528	6.29063	0.650154	0.230924	2.57039
GOTERM_BP_FAT	GO:0009890~negative regulation of biosynthetic process	6	20.6897	0.00193625	CAV1, FOXA1, RB1, ZEB1, TCF4, TWIST1	23	573	13528	6.15889	0.684371	0.205973	2.81871
GOTERM_BP_FAT	GO:0045892~negative regulation of transcription, DNA-dependent	5	17.2414	0.00236938	FOXA1, RB1, ZEB1, TCF4, TWIST1	23	356	13528	8.26087	0.756211	0.209621	3.43901
GOTERM_BP_FAT	GO:0008285~negative regulation of cell proliferation	5	17.2414	0.00249253	CAV1, LEPRE1, RB1, ZEB1, ESR2	23	361	13528	8.14645	0.773477	0.19114	3.6147
GOTERM_BP_FAT	GO:0051253~negative regulation of RNA metabolic process	5	17.2414	0.00251768	FOXA1, RB1, ZEB1, TCF4, TWIST1	23	362	13528	8.12395	0.77685	0.170962	3.65055
GOTERM_BP_FAT	GO:0010605~negative regulation of macromolecule metabolic process	6	20.6897	0.00564433	CAV1, FOXA1, RB1, ZEB1, TCF4, TWIST1	23	734	13528	4.80796	0.965538	0.285941	8.01116
GOTERM_BP_FAT	GO:0016481~negative regulation of transcription	5	17.2414	0.00588601	FOXA1, RB1, ZEB1, TCF4, TWIST1	23	459	13528	6.40712	0.970178	0.273357	8.34044
SP_PIR_KEYWORDS	activator	5	17.2414	0.00645933	GATA3, FOXA1, NEUROG1, ZEB1, TCF4	29	520	19235	6.37765	0.509746	0.299818	7.05998
GOTERM_BP_FAT	GO:0045893~positive regulation of transcription, DNA-dependent	5	17.2414	0.00673722	FOXA1, RB1, ZEB1, ESR2, TCF4	23	477	13528	6.16535	0.982087	0.284794	9.49146
GOTERM_BP_FAT	GO:0051254~positive regulation of RNA metabolic process	5	17.2414	0.00693699	FOXA1, RB1, ZEB1, ESR2, TCF4	23	481	13528	6.11407	0.984107	0.272839	9.75963
GOTERM_BP_FAT	GO:0042127~regulation of cell proliferation	6	20.6897	0.00756378	CAV1, LEPRE1, ERBB4, RB1, ZEB1, ESR2	23	787	13528	4.48417	0.989084	0.275796	10.5962
GOTERM_BP_FAT	GO:0010629~negative regulation of gene expression	5	17.2414	0.00816307	FOXA1, RB1, ZEB1, TCF4, TWIST1	23	504	13528	5.83506	0.99238	0.262736	11.3894
GOTERM_BP_FAT	GO:0045934~negative regulation of nucleobase, nucleoside, nucleotide and nucleic acid metabolic process	5	17.2414	0.00862119	FOXA1, RB1, ZEB1, TCF4, TWIST1	23	512	13528	5.74389	0.994211	0.261438	11.9913
GOTERM_BP_FAT	GO:0010604~positive regulation of macromolecule metabolic process	6	20.6897	0.0107546	CAV1, FOXA1, RB1, ZEB1, ESR2, TCF4	23	857	13528	4.1179	0.998393	0.287242	14.7443
GOTERM_BP_FAT	GO:0010558~negative regulation of macromolecule biosynthetic process	5	17.2414	0.0108259	FOXA1, RB1, ZEB1, TCF4, TWIST1	23	547	13528	5.37636	0.998461	0.276625	14.8349
GOTERM_MF_FAT	GO:0003700~transcription factor activity	7	24.1379	0.0110545	GATA3, FOXA1, NEUROG1, RB1, ZEB1, ESR2, TCF4	27	975	12983	3.45227	0.727627	0.727627	11.9284
GOTERM_BP_FAT	GO:0045941~positive regulation of transcription	5	17.2414	0.0120187	FOXA1, RB1, ZEB1, ESR2, TCF4	23	564	13528	5.21431	0.999249	0.290073	16.3374
GOTERM_BP_FAT	GO:0010628~positive regulation of gene expression	5	17.2414	0.0132942	FOXA1, RB1, ZEB1, ESR2, TCF4	23	581	13528	5.06174	0.999652	0.303689	17.9167
SP_PIR_KEYWORDS	dna-binding	8	27.5862	0.0153543	GATA3, FOXA1, NEUROG1, RB1, ZEB1, ESR2, TCF4, TWIST1	29	1868	19235	2.84058	0.817696	0.34657	16.0394
GOTERM_BP_FAT	GO:0045935~positive regulation of nucleobase, nucleoside, nucleotide and nucleic acid metabolic process	5	17.2414	0.0169034	FOXA1, RB1, ZEB1, ESR2, TCF4	23	624	13528	4.71293	0.999961	0.35662	22.2363
GOTERM_MF_FAT	GO:0008134~transcription factor binding	5	17.2414	0.018053	GATA3, RB1, ZEB1, ESR2, TCF4	27	513	12983	4.68667	0.88134	0.65553	18.7931
GOTERM_BP_FAT	GO:0006355~regulation of transcription, DNA-dependent	8	27.5862	0.0187056	GATA3, FOXA1, NEUROG1, RB1, ZEB1, ESR2, TCF4, TWIST1	23	1773	13528	2.65392	0.999987	0.373832	24.3131
GOTERM_BP_FAT	GO:0051173~positive regulation of nitrogen compound metabolic process	5	17.2414	0.0187754	FOXA1, RB1, ZEB1, ESR2, TCF4	23	644	13528	4.56657	0.999987	0.363074	24.3924
GOTERM_BP_FAT	GO:0010557~positive regulation of macromolecule biosynthetic process	5	17.2414	0.0197587	FOXA1, RB1, ZEB1, ESR2, TCF4	23	654	13528	4.49674	0.999993	0.366628	25.5025
GOTERM_BP_FAT	GO:0051252~regulation of RNA metabolic process	8	27.5862	0.0209679	GATA3, FOXA1, NEUROG1, RB1, ZEB1, ESR2, TCF4, TWIST1	23	1813	13528	2.59536	0.999997	0.34314	26.8468
GOTERM_BP_FAT	GO:0045944~positive regulation of transcription from RNA polymerase II promoter	4	13.7931	0.0214045	FOXA1, RB1, ZEB1, ESR2	23	371	13528	6.3415	0.999997	0.331228	27.3266
GOTERM_BP_FAT	GO:0031328~positive regulation of cellular biosynthetic process	5	17.2414	0.0230114	FOXA1, RB1, ZEB1, ESR2, TCF4	23	685	13528	4.29324	0.999999	0.342789	29.0673
SP_PIR_KEYWORDS	transcription regulation	8	27.5862	0.023138	GATA3, FOXA1, NEUROG1, RB1, ZEB1, ESR2, TCF4, TWIST1	29	2026	19235	2.61906	0.923853	0.40251	23.2403
GOTERM_BP_FAT	GO:0009891~positive regulation of biosynthetic process	5	17.2414	0.0241276	FOXA1, RB1, ZEB1, ESR2, TCF4	23	695	13528	4.23147	1	0.339791	30.2535
GOTERM_MF_FAT	GO:0030528~transcription regulator activity	8	27.5862	0.0256567	GATA3, FOXA1, NEUROG1, RB1, ZEB1, ESR2, TCF4, TWIST1	27	1512	12983	2.54419	0.952214	0.637116	25.6954
SP_PIR_KEYWORDS	Transcription	8	27.5862	0.0257917	GATA3, FOXA1, NEUROG1, RB1, ZEB1, ESR2, TCF4, TWIST1	29	2071	19235	2.56215	0.943545	0.38063	25.5635
GOTERM_MF_FAT	GO:0003677~DNA binding	10	34.4828	0.0319647	GATA3, FOXA1, NEUROG1, RB1, ZEB1, LHFP, CXXC5, ESR2, TCF4, TWIST1	27	2331	12983	2.06286	0.97765	0.61335	31.0105
GOTERM_MF_FAT	GO:0003712~transcription cofactor activity	4	13.7931	0.035025	RB1, ZEB1, ESR2, TCF4	27	363	12983	5.29864	0.984569	0.565814	33.462
GOTERM_CC_FAT	GO:0005667~transcription factor complex	3	10.3448	0.042038	RB1, ZEB1, TCF4	21	210	12782	8.69524	0.979042	0.724292	37.3252
GOTERM_BP_FAT	GO:0006350~transcription	8	27.5862	0.0433899	GATA3, FOXA1, NEUROG1, RB1, ZEB1, ESR2, TCF4, TWIST1	23	2101	13528	2.2396	1	0.500713	48.0248
GOTERM_BP_FAT	GO:0045596~negative regulation of cell differentiation	3	10.3448	0.0475453	CAV1, ZEB1, TWIST1	23	216	13528	8.16908	1	0.515482	51.2578
GOTERM_MF_FAT	GO:0003713~transcription coactivator activity	3	10.3448	0.0678619	RB1, ZEB1, ESR2	27	214	12983	6.74091	0.999731	0.745981	55.2018
SP_PIR_KEYWORDS	DNA binding	3	10.3448	0.0871762	RB1, ZEB1, TWIST1	29	340	19235	5.85243	0.999956	0.633346	64.3186
GOTERM_BP_FAT	GO:0045449~regulation of transcription	8	27.5862	0.1129	GATA3, FOXA1, NEUROG1, RB1, ZEB1, ESR2, TCF4, TWIST1	23	2601	13528	1.80907	1	0.752819	82.9205
GOTERM_MF_FAT	GO:0043565~sequence-specific DNA binding	4	13.7931	0.119511	GATA3, FOXA1, ZEB1, ESR2	27	607	12983	3.16871	1	0.844551	76.6451
GOTERM_BP_FAT	GO:0042592~homeostatic process	4	13.7931	0.119982	CAV1, ERBB4, FOXA1, RB1	23	751	13528	3.13275	1	0.768337	84.8252
GOTERM_MF_FAT	GO:0016564~transcription repressor activity	3	10.3448	0.131136	RB1, ZEB1, TCF4	27	316	12983	4.56505	1	0.839167	79.9358
SP_PIR_KEYWORDS	repressor	3	10.3448	0.13142	FOXA1, RB1, ZEB1	29	435	19235	4.57432	1	0.669463	79.6456
GOTERM_MF_FAT	GO:0016563~transcription activator activity	3	10.3448	0.197641	RB1, ZEB1, ESR2	27	410	12983	3.51843	1	0.923948	91.923
GOTERM_CC_FAT	GO:0044451~nucleoplasm part	3	10.3448	0.214784	RB1, ZEB1, TCF4	21	555	12782	3.29009	1	0.934139	92.7953
SP_PIR_KEYWORDS	nucleus	9	31.0345	0.273371	GATA3, FOXA1, NEUROG1, RB1, ZEB1, CXXC5, ESR2, TCF4, TWIST1	29	4283	19235	1.39376	1	0.842574	97.2893
GOTERM_BP_FAT	GO:0007242~intracellular signaling cascade	4	13.7931	0.335201	CAV1, STMN3, RB1, ESR2	23	1256	13528	1.87317	1	0.985903	99.7577
GOTERM_CC_FAT	GO:0005654~nucleoplasm	3	10.3448	0.406033	RB1, ZEB1, TCF4	21	882	12782	2.07029	1	0.985908	99.6542
GOTERM_CC_FAT	GO:0031981~nuclear lumen	3	10.3448	0.679966	RB1, ZEB1, TCF4	21	1450	12782	1.25931	1	0.997599	99.9996
GOTERM_CC_FAT	GO:0070013~intracellular organelle lumen	3	10.3448	0.788899	RB1, ZEB1, TCF4	21	1779	12782	1.02642	1	0.999369	100
GOTERM_CC_FAT	GO:0043233~organelle lumen	3	10.3448	0.800075	RB1, ZEB1, TCF4	21	1820	12782	1.0033	1	0.998991	100
GOTERM_CC_FAT	GO:0031974~membrane-enclosed lumen	3	10.3448	0.809485	RB1, ZEB1, TCF4	21	1856	12782	0.983836	1	0.998867	100
Annotation Cluster 4	Enrichment Score: 1.512033752502378
Category	Term	Count	%	PValue	Genes	List Total	Pop Hits	Pop Total	Fold Enrichment	Bonferroni	Benjamini	FDR
GOTERM_BP_FAT	GO:0007017~microtubule-based process	4	13.7931	0.00765337	CAV1, STMN3, MAPT, DYNLRB2	23	253	13528	9.29919	0.989655	0.262693	10.7152
GOTERM_BP_FAT	GO:0051493~regulation of cytoskeleton organization	3	10.3448	0.02032	CAV1, STMN3, MAPT	23	136	13528	12.9744	0.999995	0.353542	26.1293
GOTERM_BP_FAT	GO:0000226~microtubule cytoskeleton organization	3	10.3448	0.0234993	CAV1, STMN3, MAPT	23	147	13528	12.0035	0.999999	0.340417	29.5881
GOTERM_BP_FAT	GO:0033043~regulation of organelle organization	3	10.3448	0.047941	CAV1, STMN3, MAPT	23	217	13528	8.13144	1	0.509808	51.5557
GOTERM_BP_FAT	GO:0007010~cytoskeleton organization	3	10.3448	0.157142	CAV1, STMN3, MAPT	23	436	13528	4.04707	1	0.853281	91.9703
Annotation Cluster 5	Enrichment Score: 1.2234147824433064
Category	Term	Count	%	PValue	Genes	List Total	Pop Hits	Pop Total	Fold Enrichment	Bonferroni	Benjamini	FDR
GOTERM_BP_FAT	GO:0001558~regulation of cell growth	3	10.3448	0.0391613	MAPT, RB1, ESR2	23	194	13528	9.09547	1	0.473982	44.5305
GOTERM_BP_FAT	GO:0008361~regulation of cell size	3	10.3448	0.043657	MAPT, RB1, ESR2	23	206	13528	8.56564	1	0.493902	48.2385
GOTERM_BP_FAT	GO:0032535~regulation of cellular component size	3	10.3448	0.071025	MAPT, RB1, ESR2	23	271	13528	6.51115	1	0.639201	66.2724
GOTERM_BP_FAT	GO:0040008~regulation of growth	3	10.3448	0.105201	MAPT, RB1, ESR2	23	341	13528	5.17455	1	0.740694	80.5982
Annotation Cluster 6	Enrichment Score: 1.104762325841417
Category	Term	Count	%	PValue	Genes	List Total	Pop Hits	Pop Total	Fold Enrichment	Bonferroni	Benjamini	FDR
GOTERM_BP_FAT	GO:0048732~gland development	3	10.3448	0.0200407	CAV1, ERBB4, FOXA1	23	135	13528	13.0705	0.999994	0.359895	25.8181
GOTERM_BP_FAT	GO:0042592~homeostatic process	4	13.7931	0.119982	CAV1, ERBB4, FOXA1, RB1	23	751	13528	3.13275	1	0.768337	84.8252
GOTERM_BP_FAT	GO:0048878~chemical homeostasis	3	10.3448	0.20169	CAV1, ERBB4, FOXA1	23	512	13528	3.44633	1	0.912568	96.3959
Annotation Cluster 7	Enrichment Score: 0.9598701245248468
Category	Term	Count	%	PValue	Genes	List Total	Pop Hits	Pop Total	Fold Enrichment	Bonferroni	Benjamini	FDR
GOTERM_CC_FAT	GO:0005578~proteinaceous extracellular matrix	5	17.2414	0.00135992	FLRT2, LEPRE1, FBN1, ANGPTL4, MMP11	21	320	12782	9.51042	0.115273	0.115273	1.46953
GOTERM_CC_FAT	GO:0031012~extracellular matrix	5	17.2414	0.00179402	FLRT2, LEPRE1, FBN1, ANGPTL4, MMP11	21	345	12782	8.82126	0.149225	0.0776251	1.93447
SP_PIR_KEYWORDS	extracellular matrix	4	13.7931	0.00504945	LEPRE1, FBN1, ANGPTL4, MMP11	29	241	19235	11.0087	0.426987	0.426987	5.55896
SP_PIR_KEYWORDS	signal	10	34.4828	0.0358911	FLRT2, LEPRE1, ERBB4, PVRL3, FBN1, TMEM158, AXL, LHFP, ANGPTL4, MMP11	29	3250	19235	2.04085	0.982058	0.436943	33.8313
UP_SEQ_FEATURE	signal peptide	10	34.4828	0.0372287	FLRT2, LEPRE1, ERBB4, PVRL3, FBN1, TMEM158, AXL, LHFP, ANGPTL4, MMP11	29	3250	19113	2.0279	0.999364	0.914	37.6969
GOTERM_CC_FAT	GO:0044421~extracellular region part	5	17.2414	0.0583117	FLRT2, LEPRE1, FBN1, ANGPTL4, MMP11	21	960	12782	3.17014	0.995516	0.741231	47.9833
UP_SEQ_FEATURE	disulfide bond	7	24.1379	0.223339	ERBB4, PVRL3, MAPT, FBN1, AXL, ANGPTL4, MMP11	29	2819	19113	1.63657	1	0.999092	95.7241
SP_PIR_KEYWORDS	disulfide bond	7	24.1379	0.24505	ERBB4, PVRL3, MAPT, FBN1, AXL, ANGPTL4, MMP11	29	2924	19235	1.58787	1	0.82055	95.8247
GOTERM_CC_FAT	GO:0044459~plasma membrane part	6	20.6897	0.253569	FLRT2, CAV1, ERBB4, PVRL3, MAPT, AXL	21	2203	12782	1.65774	1	0.94631	95.8477
SP_PIR_KEYWORDS	glycoprotein	9	31.0345	0.281383	FLRT2, LEPRE1, ERBB4, PVRL3, MAPT, FBN1, TMEM158, AXL, ANGPTL4	29	4318	19235	1.38246	1	0.837544	97.6085
GOTERM_MF_FAT	GO:0042802~identical protein binding	3	10.3448	0.369259	CAV1, PVRL3, MAPT	27	640	12983	2.25399	1	0.978751	99.4836
GOTERM_CC_FAT	GO:0005576~extracellular region	5	17.2414	0.387598	FLRT2, LEPRE1, FBN1, ANGPTL4, MMP11	21	2010	12782	1.5141	1	0.987885	99.5178
UP_SEQ_FEATURE	glycosylation site:N-linked (GlcNAc...)	8	27.5862	0.401753	FLRT2, LEPRE1, ERBB4, PVRL3, FBN1, TMEM158, AXL, ANGPTL4	29	4129	19113	1.27696	1	0.999996	99.835
SP_PIR_KEYWORDS	Secreted	4	13.7931	0.45102	LEPRE1, FBN1, ANGPTL4, MMP11	29	1689	19235	1.57081	1	0.943193	99.8859
GOTERM_CC_FAT	GO:0005886~plasma membrane	6	20.6897	0.749009	FLRT2, CAV1, ERBB4, PVRL3, MAPT, AXL	21	3777	12782	0.966905	1	0.999004	100
UP_SEQ_FEATURE	topological domain:Extracellular	4	13.7931	0.781823	FLRT2, ERBB4, PVRL3, AXL	29	2719	19113	0.969576	1	1	100
SP_PIR_KEYWORDS	cell membrane	3	10.3448	0.845138	CAV1, PVRL3, MAPT	29	2194	19235	0.906941	1	0.998929	100
Annotation Cluster 8	Enrichment Score: 0.5915135020822457
Category	Term	Count	%	PValue	Genes	List Total	Pop Hits	Pop Total	Fold Enrichment	Bonferroni	Benjamini	FDR
GOTERM_MF_FAT	GO:0019899~enzyme binding	4	13.7931	0.0851918	CAV1, MLPH, MAPT, RB1	27	523	12983	3.67764	0.99997	0.774233	63.8481
GOTERM_CC_FAT	GO:0005856~cytoskeleton	5	17.2414	0.163054	ERBB4, MLPH, MAPT, RB1, DYNLRB2	21	1381	12782	2.20372	1	0.959397	85.5773
UP_SEQ_FEATURE	mutagenesis site	6	20.6897	0.173921	ERBB4, MLPH, NAT1, MAPT, AXL, RB1	29	2045	19113	1.9337	1	0.997925	90.7712
GOTERM_CC_FAT	GO:0044430~cytoskeletal part	4	13.7931	0.183228	ERBB4, MAPT, RB1, DYNLRB2	21	952	12782	2.55742	1	0.95197	88.9397
GOTERM_CC_FAT	GO:0015630~microtubule cytoskeleton	3	10.3448	0.211302	MAPT, RB1, DYNLRB2	21	549	12782	3.32605	1	0.952732	92.44
SP_PIR_KEYWORDS	acetylation	5	17.2414	0.546469	BLVRA, CAV1, MAPT, RB1, DYNLRB2	29	2635	19235	1.25859	1	0.973324	99.9868
GOTERM_CC_FAT	GO:0043228~non-membrane-bounded organelle	5	17.2414	0.602109	ERBB4, MLPH, MAPT, RB1, DYNLRB2	21	2596	12782	1.17232	1	0.996032	99.9956
GOTERM_CC_FAT	GO:0043232~intracellular non-membrane-bounded organelle	5	17.2414	0.602109	ERBB4, MLPH, MAPT, RB1, DYNLRB2	21	2596	12782	1.17232	1	0.996032	99.9956
Annotation Cluster 9	Enrichment Score: 0.567619489260757
Category	Term	Count	%	PValue	Genes	List Total	Pop Hits	Pop Total	Fold Enrichment	Bonferroni	Benjamini	FDR
SP_PIR_KEYWORDS	zinc	7	24.1379	0.091076	BLVRA, MLPH, GATA3, ZEB1, CXXC5, ESR2, MMP11	29	2189	19235	2.12103	0.999973	0.615164	66.0035
SP_PIR_KEYWORDS	metal-binding	8	27.5862	0.129586	BLVRA, LEPRE1, MLPH, GATA3, ZEB1, CXXC5, ESR2, MMP11	29	2972	19235	1.7854	1	0.690979	79.1548
SP_PIR_KEYWORDS	zinc-finger	5	17.2414	0.237218	MLPH, GATA3, ZEB1, CXXC5, ESR2	29	1718	19235	1.93037	1	0.826594	95.3083
GOTERM_MF_FAT	GO:0008270~zinc ion binding	7	24.1379	0.311757	BLVRA, MLPH, GATA3, ZEB1, CXXC5, ESR2, MMP11	27	2311	12983	1.4565	1	0.9812	98.6007
GOTERM_MF_FAT	GO:0046914~transition metal ion binding	8	27.5862	0.31663	BLVRA, LEPRE1, MLPH, GATA3, ZEB1, CXXC5, ESR2, MMP11	27	2785	12983	1.38126	1	0.975572	98.7098
GOTERM_MF_FAT	GO:0046872~metal ion binding	10	34.4828	0.454867	BLVRA, LEPRE1, ADHFE1, MLPH, GATA3, FBN1, ZEB1, CXXC5, ESR2, MMP11	27	4140	12983	1.16148	1	0.991195	99.9025
GOTERM_MF_FAT	GO:0043169~cation binding	10	34.4828	0.468079	BLVRA, LEPRE1, ADHFE1, MLPH, GATA3, FBN1, ZEB1, CXXC5, ESR2, MMP11	27	4179	12983	1.15064	1	0.990109	99.9263
GOTERM_MF_FAT	GO:0043167~ion binding	10	34.4828	0.48906	BLVRA, LEPRE1, ADHFE1, MLPH, GATA3, FBN1, ZEB1, CXXC5, ESR2, MMP11	27	4241	12983	1.13382	1	0.990162	99.9535
Annotation Cluster 10	Enrichment Score: 0.21434141500495496
Category	Term	Count	%	PValue	Genes	List Total	Pop Hits	Pop Total	Fold Enrichment	Bonferroni	Benjamini	FDR
GOTERM_CC_FAT	GO:0044459~plasma membrane part	6	20.6897	0.253569	FLRT2, CAV1, ERBB4, PVRL3, MAPT, AXL	21	2203	12782	1.65774	1	0.94631	95.8477
SP_PIR_KEYWORDS	receptor	4	13.7931	0.408549	ERBB4, PVRL3, AXL, ESR2	29	1583	19235	1.676	1	0.927624	99.7351
GOTERM_CC_FAT	GO:0005887~integral to plasma membrane	3	10.3448	0.566777	FLRT2, CAV1, AXL	21	1188	12782	1.53704	1	0.996946	99.9888
GOTERM_CC_FAT	GO:0031226~intrinsic to plasma membrane	3	10.3448	0.579547	FLRT2, CAV1, AXL	21	1215	12782	1.50288	1	0.996189	99.9919
UP_SEQ_FEATURE	transmembrane region	8	27.5862	0.605187	FLRT2, CAV1, TMEM45B, ERBB4, PVRL3, TMEM158, AXL, LHFP	29	4911	19113	1.07362	1	1	99.9991
SP_PIR_KEYWORDS	transmembrane	8	27.5862	0.612596	FLRT2, CAV1, TMEM45B, ERBB4, PVRL3, TMEM158, AXL, LHFP	29	4973	19235	1.067	1	0.975897	99.9978
SP_PIR_KEYWORDS	membrane	9	31.0345	0.736742	FLRT2, CAV1, TMEM45B, ERBB4, PVRL3, MAPT, TMEM158, AXL, LHFP	29	6256	19235	0.954201	1	0.993669	100
GOTERM_CC_FAT	GO:0005886~plasma membrane	6	20.6897	0.749009	FLRT2, CAV1, ERBB4, PVRL3, MAPT, AXL	21	3777	12782	0.966905	1	0.999004	100
UP_SEQ_FEATURE	topological domain:Cytoplasmic	5	17.2414	0.753973	FLRT2, CAV1, ERBB4, PVRL3, AXL	29	3374	19113	0.976688	1	1	100
UP_SEQ_FEATURE	topological domain:Extracellular	4	13.7931	0.781823	FLRT2, ERBB4, PVRL3, AXL	29	2719	19113	0.969576	1	1	100
GOTERM_CC_FAT	GO:0016021~integral to membrane	8	27.5862	0.78997	FLRT2, CAV1, TMEM45B, ERBB4, PVRL3, TMEM158, AXL, LHFP	21	5297	12782	0.919262	1	0.999108	100
GOTERM_CC_FAT	GO:0031224~intrinsic to membrane	8	27.5862	0.826267	FLRT2, CAV1, TMEM45B, ERBB4, PVRL3, TMEM158, AXL, LHFP	21	5485	12782	0.887754	1	0.998939	100
